# Supplementary material
Source: PubMed Central journal article supplement (PMC3350773)
Supplement: NIHMS360338-supplement-1_si_001.pdf [file NIHMS360338-supplement-1_si_001.pdf]

# Supporting Information

## Two separate gene clusters encode the biosynthetic pathway for the meroterpenoids austinol and dehydroaustinol in *Aspergillus nidulans*

Hsien-Chun Lo, Ruth Entwistle, Chun-Jun Guo, Manmeet Ahuja, Edyta Szewczyk, Jui-Hsiang Hung, Yi-Ming Chiang, Berl R. Oakley,\* and Clay C. C. Wang\*

\*Correspondence should be addressed to B.O. (boakley@ku.edu) and C.W. (clayw@usc.edu).

### Table of Contents

|                                                                                                                              |     |
|------------------------------------------------------------------------------------------------------------------------------|-----|
| <b>Detailed structure characterization</b>                                                                                   | S 3 |
| <b>Supplemental methods</b>                                                                                                  | S5  |
| <b>Supplemental references</b>                                                                                               | S7  |
| <b>Table S1.</b> <i>A. nidulans</i> strains used in this study                                                               | S8  |
| <b>Table S2.</b> Primers used in this study                                                                                  | S10 |
| <b>Table S3.</b> NMR data for compound <b>4</b>                                                                              | S15 |
| <b>Table S4.</b> NMR data for compound <b>6</b>                                                                              | S16 |
| <b>Table S5.</b> NMR data for compound <b>8</b>                                                                              | S17 |
| <b>Table S6.</b> NMR data for compound <b>10</b>                                                                             | S18 |
| <b>Table S7.</b> NMR data for compound <b>12</b>                                                                             | S19 |
| <b>Table S8.</b> NMR data for compound <b>13</b>                                                                             | S20 |
| <b>Table S9.</b> <sup>1</sup> H NMR data for compounds <b>5, 7, 9, 11</b>                                                    | S21 |
| <b>Table S10.</b> <sup>13</sup> C NMR data for compounds <b>5, 7, 9, 11</b>                                                  | S22 |
| <b>Table S11.</b> Annotation of genes internal to the clusters A and B not required in austinol/dehydroaustinol biosynthesis | S23 |
| <b>Figure S1.</b> UV-Vis and ESIMS spectra of compounds <b>3 – 13</b>                                                        | S24 |
| <b>Figure S2.</b> HPLC profiles of extracts from knockout strains not shown in fig. 4 and 5                                  | S25 |
| <b>Figure S3.</b> Schematic of the diagnostic PCR strategy                                                                   | S26 |
| <b>Figure S4.</b> Results of diagnostic PCR                                                                                  | S27 |
| <b>Figure S5.</b> ORTEP drawing of compound <b>12</b>                                                                        | S32 |

|                                                                                          |     |
|------------------------------------------------------------------------------------------|-----|
| <b>Figure S6.</b> Key gHMBC and NOESY correlations of compound <b>13</b>                 | S32 |
| <b>Figure S7.</b> $^1\text{H}$ NMR spectrum of compound <b>4</b>                         | S33 |
| <b>Figure S8.</b> $^{13}\text{C}$ NMR spectrum of compound <b>4</b>                      | S33 |
| <b>Figure S9.</b> $^1\text{H}$ NMR spectrum of compound <b>4</b> after autooxidation     | S34 |
| <b>Figure S10.</b> $^{13}\text{C}$ NMR spectrum of compound <b>4</b> after autooxidation | S34 |
| <b>Figure S11.</b> $^1\text{H}$ NMR spectrum of compound <b>6</b>                        | S35 |
| <b>Figure S12.</b> $^{13}\text{C}$ NMR spectrum of compound <b>6</b>                     | S35 |
| <b>Figure S13.</b> $^1\text{H}$ NMR spectrum of compound <b>8</b>                        | S36 |
| <b>Figure S14.</b> $^{13}\text{C}$ NMR spectrum of compound <b>8</b>                     | S36 |
| <b>Figure S15.</b> $^1\text{H}$ NMR spectrum of compound <b>10</b>                       | S37 |
| <b>Figure S16.</b> $^{13}\text{C}$ NMR spectrum of compound <b>10</b>                    | S37 |
| <b>Figure S17.</b> $^1\text{H}$ NMR spectrum of compound <b>12</b>                       | S38 |
| <b>Figure S18.</b> $^{13}\text{C}$ NMR spectrum of compound <b>12</b>                    | S38 |
| <b>Figure S19.</b> $^1\text{H}$ NMR spectrum of compound <b>13</b>                       | S39 |
| <b>Figure S20.</b> $^{13}\text{C}$ NMR spectrum of compound <b>13</b>                    | S39 |
| <b>Figure S21.</b> Relationship between homologous genes                                 | S40 |

## Detailed structural characterization

Compound **4** was isolated as slight yellowish gum. The molecular formula was found to be  $C_{26}H_{38}O_5$  by its  $^{13}C$  NMR and DEPT spectral data, suggesting eight indices of hydrogen deficiency (IHD). The  $^1H$ ,  $^{13}C$ , gHMBC, and gHMBC NMR spectroscopic data of compound **4** (Table S3) including the  $3\beta$ -hydroxy group ( $\delta_H$  3.11 and  $\delta_C$  78.3), the CH-5 methine group ( $\delta_H$  0.56 and  $\delta_C$  54.4), and three methyl groups ( $\delta_H$  0.78 and  $\delta_C$  15.9,  $CH_3$ -13;  $\delta_H$  0.73 and  $\delta_C$  15.5,  $CH_3$ -14; and  $\delta_H$  0.94 and  $\delta_C$  27.8,  $CH_3$ -15) exhibit typical  $3\beta$ -hydroxy-4,4,8,10-tetramethyldecalin partial structure that were observed in many triterpenoids.<sup>1</sup> This suggested that compound **4** is an intermediate biosynthesized before the spiro ring formation in the austinol biosynthetic pathway. The NMR data also showed signals for one downfield methine group [ $\delta_H$  3.91 (1H, q,  $J$  = 6.4 Hz, H-5') and  $\delta_C$  62.5 (C-5')], one terminal double bond [ $\delta_H$  4.82 and 5.29 (each 1H, br s, H<sub>2</sub>-1'), and  $\delta_C$  112.0 (C-1') and 146.8 (C-2')], one carboxymethyl ester [ $\delta_H$  3.67 (3H, s, OMe), and  $\delta_C$  52.0 (OMe) and 169.2 (C-8')], and two ketone groups [ $\delta_C$  204.1 (C-6') and 209.4 (C-4')]. These data indicated that compound **4** have similar partial structure of C and D rings with preaustinoid A, an early intermediate in the austinol biosynthetic pathway.<sup>2,3</sup> Comparison of the  $^1H$  and  $^{13}C$  NMR spectra between compound **4** and preaustinoid A revealed that the only difference in C and D rings is that compound **4** do not contain hydroxyl group on C-5'. This resulted in the quartet splitting of H-5' ( $\delta_H$  3.91, 1H,  $J$  = 6.4 Hz) and the doublet splitting of H<sub>3</sub>-10' ( $\delta_H$  1.19, 3H,  $J$  = 6.4 Hz) in its  $^1H$  NMR. gHMBC also confirmed the assigned structure. Therefore, the structure of this new meroterpene, named protoaustinoid A, was assigned as **4**. However, protoaustinoid A is not stable and became a mixture of more than two compounds in the NMR tube during acquiring its 2D spectra in  $CDCl_3$ . The  $^1H$  NMR spectra of the mixture showed the disappearance of H-5' methine proton at  $\delta_H$  3.91 and  $^{13}C$  NMR spectra of that showed the appearance of a hydroperoxy carbon at  $\delta_C$  95.3 (Figure S9 and S10). These evidences indicated that protoaustinoid A autooxidized to its 5'-hydroperoxide derivatives **4'** in  $CDCl_3$  due to the susceptible H-5' in the  $\beta$ -diketone ring D. However, the stereochemistry of C-5' of protoaustinoid A **4** remains to be determined.

Compound **6** was isolated as colorless needles. The molecular formula was found to be  $C_{26}H_{32}O_7$  by its  $^{13}C$  NMR, DEPT and HRESIMS spectral data, suggesting eleven IHD. The IR spectrum showed hydroxyl ( $3383\text{ cm}^{-1}$ ) and ester or ketone functionalities ( $1759$  and  $1715\text{ cm}^{-1}$ ). The  $^1H$  NMR spectrum of compound **6** (Table S4) exhibited signals for five methyl groups [ $\delta_H$  1.24, 1.27, 1.35, 1.39, and 1.55 (each 3H)], one acetyl group [ $\delta_H$  2.02 (3H, s)], one methoxyl group [ $\delta_H$  3.70 (3H, s)], two terminal olefinic protons [ $\delta_H$  5.34 and 5.90 (each 1H, br s)], and one pair of deshielded *cis* 1,2-disubstituted olefinic protons [ $\delta_H$  6.01 and 6.73 (each 1H, d,  $J$  = 10.0 Hz)]. The gHMBC correlations of the deshielded 1, 2-disubstituted olefinic protons with a carbonylic carbon [ $\delta_C$  164.2, C-3] suggested the presence of an  $\alpha,\beta$ -unsaturated  $\delta$ -lactone moiety which has been observed in many meroterpenes.<sup>2,4</sup> Comparison the  $^1H$  and  $^{13}C$  NMR of compound **6** with those of preaustinoid A3 (**5**) suggested that compound **6** has similar partial structure of A, B and C rings with preaustinoid A3.<sup>2</sup> In gHMBC spectrum, the key long-range  $^1H$ - $^{13}C$  correlations between methyl H<sub>3</sub>-9' ( $\delta_H$  1.27) and ketone C-4' ( $\delta_C$  211.1); as well as between acetyl

H<sub>3</sub>-10' ( $\delta_{\text{H}}$  2.02) and ketone C-5' ( $\delta_{\text{C}}$  201.3) and tertiary hydroxyl C-6' ( $\delta_{\text{C}}$  92.9) established the partial structure of D ring. NOESY correlation between H<sub>3</sub>-9' and H<sub>3</sub>-10' suggested that the acetyl group should locate on the  $\beta$  face. Thus, the structure of this meroterpene, named preaustinoid A4, was assigned as shown in **6**.

Compound **8**, colorless needles, analyzed to have molecular formula C<sub>25</sub>H<sub>30</sub>O<sub>7</sub> by its <sup>13</sup>C NMR, DEPT and HRESIMS spectral data. The <sup>1</sup>H and <sup>13</sup>C NMR spectral data of compound **8** (Table S5) were similar to those of isoaustinone **7**,<sup>2</sup> except for the existence of a secondary hydroxyl group at C-11 in compound **8**. This caused the downfield shift of H <sub>$\alpha$</sub> -11 from  $\delta_{\text{H}}$  2.88 in **7** to  $\delta_{\text{H}}$  4.25 in **8**. The C-11 hydroxyl group was assigned to locate at  $\beta$  face due to the NOESY correlation with H<sub>3</sub>-12. 2D NMR spectra (Table S5) also confirmed the assigned structure. Therefore, compound **8** was established to be 11 $\beta$ -hydroxyisoaustinone.

Compound **10** was isolated as colorless amorphous solid. This compound has molecular formula C<sub>26</sub>H<sub>32</sub>O<sub>7</sub> and is a constitutional isomer of preaustinoid A4 **6**. These two compounds have similar <sup>13</sup>C NMR spectra especially for those signals located on the A, B, and C ring (Table S6 and S4). The major difference of gHMBC spectrum is that methyl H<sub>3</sub>-9' ( $\delta_{\text{H}}$  1.06) connected to the tertiary hydroxyl C-4' ( $\delta_{\text{C}}$  92.9) in compound **10**, unlike compound **6** of which H<sub>3</sub>-9' is connected to ketone C-4'. Moreover, the D<sub>2</sub>O exchangeable hydroxyl proton ( $\delta_{\text{H}}$  4.56) displays long-range <sup>1</sup>H-<sup>13</sup>C correlations with C-3' ( $\delta_{\text{C}}$  50.1), C-4' ( $\delta_{\text{C}}$  92.2) and C-5' ( $\delta_{\text{C}}$  202.6). These data suggested that the acetyl and hydroxyl groups are attached to C-4' in compound **10**. The acetyl group is located at  $\beta$  face due to its NOESY correlation with H<sub>3</sub>-9'. Thus, the structure of this meroterpene, named preaustinoid A5, was assigned as shown in **10**.

Compound **12** was isolated as colorless plates. Its <sup>1</sup>H and <sup>13</sup>C NMR spectra were nearly identical with those of isoaustinone **7** suggested that **12** is a stereoisomer of **7**. The major spectral difference of compound **12** and **7** were those signals from CH-5' ( $\delta_{\text{H}}$  4.46 and  $\delta_{\text{C}}$  84.5 in **12**;  $\delta_{\text{H}}$  4.28 and  $\delta_{\text{C}}$  76.3 in **7**) and CH<sub>3</sub>-10' ( $\delta_{\text{H}}$  1.15 and  $\delta_{\text{C}}$  18.1 in **12**;  $\delta_{\text{H}}$  1.28 and  $\delta_{\text{C}}$  12.6 in **7**) (Table S7 and S9). This suggested that compound **12** is a 5'*R* isomer of **7**. However, no obvious NOESY correlation of H<sub>3</sub>-10' with other protons led us to perform the single-crystal X-ray diffraction study (Figure S5). This confirmed the assigned structure of compound **12**, (5'*R*)-isoaustinone.

The molecular formula of Compound **13** was deduced to be C<sub>25</sub>H<sub>30</sub>O<sub>7</sub> from its <sup>13</sup>C NMR, DEPT and HRESIMS spectral data, representing eleven IHD. Its <sup>1</sup>H, <sup>13</sup>C, and gHMQC spectra exhibit signals for three double bonds (including one 1,2-disubstituted and two tetrasubstituted olefins) and three carbonyl groups, suggesting that **13** is a pentacyclic compound. Moreover, the <sup>1</sup>H, <sup>13</sup>C, and gHMQC NMR data of **13** also revealed signals for five singlet methyl groups [ $\delta_{\text{H}}$  1.40 (6H, H<sub>3</sub>-14 and H<sub>3</sub>-15), 1.62 (3H, H<sub>3</sub>-12), 1.79 (3H, H<sub>3</sub>-9'), and 1.83 (3H, H<sub>3</sub>-13)], one doublet methyl group [ $\delta_{\text{H}}$  1.47 (3H, *J* = 6.4 Hz, H<sub>3</sub>-10')], three methylene groups [ $\delta_{\text{H}}$  1.63 and 1.86 (each 1H, H<sub>2</sub>-6), 1.72 and 2.81 (each 1H, H<sub>2</sub>-7), and 3.02 and 3.23 (each 1H, H<sub>2</sub>-1')], two oxygenated methine protons [ $\delta_{\text{H}}$  4.70 (1H, H-5') and 5.16 (1H, H-11)], and one *cis* 1,2-disubstituted olefin [ $\delta_{\text{H}}$  5.95 (1H, H-2) and 6.42 (1H,



H-1)] (Table S8). The  $^1\text{H}$  and  $^{13}\text{C}$  NMR signals in A, B, and E rings of **13** are similar to those of isoaustinone **7**, 11 $\beta$ -hydroxyisoaustinone **8**, and (5'*R*)-isoaustinone **12** and can be assigned unambiguously *via* the  $^1\text{H}$ - $^{13}\text{C}$  gHMBC correlations (Table S8). Similar to 11 $\beta$ -hydroxyisoaustinone **8**, there is a hydroxyl group located on C-11 in **13** due to the gHMBC correlations of H-11 ( $\delta_{\text{H}}$  5.16) to C-9 ( $\delta_{\text{C}}$  142.0) and C-10 ( $\delta_{\text{C}}$  134.5). However, unlike H-11 in 11 $\beta$ -hydroxyisoaustinone **8** which flanked by two quaternary carbons, H-11 in **13** has  $^1\text{H}$ - $^1\text{H}$  COSY correlations with the methylene (H<sub>2</sub>-1'). The planar structure of C and D rings were then established from gHMBC correlations (Figure S6a). The H-5' is located at  $\alpha$  face due to its NOESY correlation with H<sub>2</sub>-7 (Figure S6b). Thus, the structure of this novel meroterpene, named neoaustinone, was assigned as shown in **13**.

Five known compounds were identified as 3,5-dimethylloresellinic acid **3**,<sup>5</sup> preaustinoid A3 **5**,<sup>2</sup> isoaustinone **7**,<sup>2</sup> austinolide **9**,<sup>2</sup> and austinoneol A **11**<sup>4</sup> by comparing their NMR (Table S9 and S10) and MS data as well as optical rotations with those reported in the literature.<sup>4</sup>

## Supplemental methods

### Isolation and identification of secondary metabolites

For structure elucidation, each *A. nidulans* deletion was cultivated at 37 °C on ~20 solid YAG plates at  $2.25 \times 10^7$  spores per 15-cm plates (~55 ml of medium per plate). After 3 days, agar was chopped into small pieces and then soaked in 800 ml of 1:1 CH<sub>2</sub>Cl<sub>2</sub>/MeOH for 24 hr twice. After filtration, the combined extract was evaporated *in vacuo* to yield a residue, which was suspended in water (500 ml) (Water layer was further acidified to pH 2 for AN9259.4 deletion) and then partitioned with ethyl acetate (500 ml) three times. The combined ethyl acetate layer was evaporated *in vacuo* to afford a crude extract (the weight for each deletion is listed below). The crude extract was applied to a Si gel column (Merck, 230 to 400 mesh, ASTM, 20 × 80 mm) and eluted with 250 ml CH<sub>2</sub>Cl<sub>2</sub>/MeOH mixtures of increasing polarity (fraction A, 1:0; fraction B, 19:1; fraction C, 9:1; fraction D, 7:3). All the meroterpenoids were eluted in fraction B and the weight of each fraction B per liter of medium was listed below.

| Deletion  | Crude weight (mg) | Fraction B weight (mg) | Silica gel used (g) | Crude weight (mg/L) | Fraction B weight (mg/L) |
|-----------|-------------------|------------------------|---------------------|---------------------|--------------------------|
| AN8379.4  | 790               | 184.0                  | 51.4                | 658                 | 153.3                    |
| AN9247.4  | 340               | 219.9                  | 22.1                | 378                 | 244.4                    |
| AN9248.4  | 370               | 248.8                  | 24.1                | 296                 | 199.1                    |
| AN9249.4  | 190               | 104.0                  | 12.4                | 200                 | 109.5                    |
| AN9253.4  | 680               | 189.8                  | 44.2                | 591                 | 165.0                    |
| AN9259.4  | 600               | 50.5                   | 39.0                | 600                 | 50.5                     |
| AN11205.4 | 400               | 210.0                  | 26.0                | 421                 | 221.1                    |
| AN11214.4 | 430               | 187.0                  | 28.0                | 344                 | 149.6                    |

Fraction B was further purified by reverse phase HPLC [Phenomenex Luna 5 $\mu\text{m}$  C18 (2), 250 × 10 mm] with a flow rate of 5.0 mL/min and measured by a UV detector at 254 nm. The gradient system was MeCN (solvent B) in 5 % MeCN/H<sub>2</sub>O (solvent A) both containing 0.05 % TFA. The HPLC gradient condition of each deletion is listed below.

Gradient condition for AN8379.4 delectant:

50 to 70 % B from 0 to 5 min, 70 to 75 % B from 5 to 15 min, 75 to 85 % B from 15 to 20 min, 85 to 100 % B from 20 to 25, maintained at 100 % B from 25 to 30 min, 100 to 50 % B from 30 to 32 min, and re-equilibration with 50 % B from 33 to 36 min. Compound **4** (6.4 mg/L of medium) was eluted at 8.3 min.

Gradient condition for AN9247.4 delectant:

50 to 65 % B from 0 to 15 min, 65 to 100 % B from 15 to 20 min, maintained at 100 % B from 20 to 22 min, 100 to 55 % B from 22 to 24 min, and re-equilibration with 55 % B from 24 to 26 min. Compound **13** (9.7 mg/L of medium), **1** (7.5 mg/L of medium), **2** (7.1 mg/L of medium), **5** (15.9 mg/L of medium), **11** (19.1 mg/L of medium), and **12** (9.0 mg/L of medium) were eluted at 4.7, 5.5, 5.8, 7.3, 7.6, and 7.9 min, respectively.

Gradient condition for AN9248.4 delectant:

50 to 68 % B from 0 to 5 min, 68 to 68 % B from 5 to 20 min, 68 to 100 % B from 20 to 23 min, maintained at 100 % B from 23 to 25 min, 100 to 50 % B from 25 to 27 min, and re-equilibration with 50 % B from 27 to 29 min. Compound **9** (28.8 mg/L of medium), **12** (1.9 mg/L of medium), and **7** (3.7 mg/L of medium) were eluted at 7.2, 7.9, and 8.0 min, respectively.

Gradient condition for AN9249.4 delectant:

50 to 68 % B from 0 to 3 min, 68 to 70 % B from 3 to 20 min, 70 to 100 % B from 20 to 23 min, maintained at 100 % B from 23 to 25 min, 100 to 50 % B from 25 to 27 min, and re-equilibration with 50 % B from 27 to 29 min. Compound **12** (17.1 mg/L of medium) were eluted at 7.6 min.

Gradient condition for AN9253.4 delectant:

55 to 57 % B from 0 to 2 min, 57 to 62 % B from 2 to 12 min, 62 to 100 % B from 12 to 17 min, maintained at 100 % B from 17 to 19 min, 100 to 55% B from 19 to 21 min, and re-equilibration with 55 % B from 21 to 23 min. Compound **8** (21.7 mg/L of medium) and **7** (32.3 mg/L of medium) were eluted at 5.1 and 9.3 min, respectively.

Gradient condition for AN9259.4 delectant:

0 % B from 0 to 5 min, 0 to 100 % B from 5 to 35 min, maintained at 100 % B from 35 to 40 min, 100 to 0% B from 40 to 45 min, and re-equilibration with 0 % B from 45 to 50 min. Compound **3** (5.1 mg/L of medium) was eluted at 5.1 min.

Gradient condition for AN11205.4 delectant:

The gradient system was same with that applied in AN9253.4 delectant. Compound **11** (11.9 mg/L of medium), **6** (21.3 mg/L of medium), and **10** (7.1 mg/L of medium) were eluted at 7.6, 8.0, and 8.4 min, respectively.

Gradient condition for AN11214.4 delectant:

50 % B from 0 to 5 min, 55 % B from 5 to 7 min, 55 to 100 % B from 7 to 10 min, maintained at 100 % B from 10 to 12 min, 100 to 50% B from 12 to 14 min, and re-equilibration with 50% B from 14 to 16 min. Compound **5** (26.7 mg/L of medium) was eluted at 7.3 min.

### **Supplemental references**

- (1) Chiang, Y. M.; Kuo, Y. H. *J. Org. Chem.* **2002**, 7656-7661.
- (2) Fill, T.P.; Pereira, G.K.; Geris dos Santos, R.M.; Barisson, A.; Rodrigues-Fo, E. *Z. Naturforsch.* **2007**, 62b, 1035-1044.
- (3) Geris, R. M.; Rodrigues-fo, E. *Phytochemistry* **2002**, 61, 907-912.
- (4) Santos, R. M. G. D.; Rodrigues-Filho, E. *J. Brazil. Chem. Soc.* **2003**, 14, 722-727.
- (5) Hirota, A.; Morimitsu, Y. ; H. H. ; *Biosci. Biotech. Biochem.* **1997**, 61, 647-650.

**Table S1.** *A. nidulans* strains used in this study.

| Fungal strain or Transformant(s) | Gene mutation(s) | Genotype                                                                  |
|----------------------------------|------------------|---------------------------------------------------------------------------|
| LO2026 <sup>a</sup>              |                  | <i>pyrG89; pyroA4, nkuA::argB, riboB2, stcJ::riboB</i>                    |
| LO3270, LO3272, LO3273           | AN8376.4Δ        | <i>pyrG89; pyroA4, nkuA::argB; riboB2, stcJ::riboB; AN8376.4::AfpYrG</i>  |
| LO3284, LO3287                   | AN8377.4Δ        | <i>pyrG89; pyroA4, nkuA::argB; riboB2, stcJ::riboB; AN8377.4::AfpYrG</i>  |
| LO3239, LO3240, LO3241           | AN8378.4Δ        | <i>pyrG89; pyroA4, nkuA::argB; riboB2, stcJ::riboB; AN8378.4::AfpYrG</i>  |
| LO3244, LO3245, LO3246           | AN8379.4Δ        | <i>pyrG89; pyroA4, nkuA::argB; riboB2, stcJ::riboB; AN8379.4::AfpYrG</i>  |
| LO3250, LO3251                   | AN8380.4Δ        | <i>pyrG89; pyroA4, nkuA::argB; riboB2, stcJ::riboB; AN8380.4::AfpYrG</i>  |
| LO3307, LO3308, LO3309           | AN8381.4Δ        | <i>pyrG89; pyroA4, nkuA::argB; riboB2, stcJ::riboB; AN8381.4::AfpYrG</i>  |
| LO3254, LO3255, LO3256           | AN8382.4Δ        | <i>pyrG89; pyroA4, nkuA::argB; riboB2, stcJ::riboB; AN8382.4::AfpYrG</i>  |
| LO3448, LO3449, LO3450           | AN8383.4Δ        | <i>pyrG89; pyroA4, nkuA::argB; riboB2, stcJ::riboB; AN8383.4::AfpYrG</i>  |
| LO3259, LO3260, LO3261           | AN8384.4Δ        | <i>pyrG89; pyroA4, nkuA::argB; riboB2, stcJ::riboB; AN8384.4::AfpYrG</i>  |
| LO3264, LO3266                   | AN8385.4Δ        | <i>pyrG89; pyroA4, nkuA::argB; riboB2, stcJ::riboB; AN8385.4::AfpYrG</i>  |
| LO3311, LO3314                   | AN11077.4Δ       | <i>pyrG89; pyroA4, nkuA::argB; riboB2, stcJ::riboB; AN11077.4::AfpYrG</i> |
| LO3275, LO3277                   | AN11085.4Δ       | <i>pyrG89; pyroA4, nkuA::argB; riboB2, stcJ::riboB; AN11085.4::AfpYrG</i> |
| LO3279, LO3280, LO3281           | AN8387.4Δ        | <i>pyrG89; pyroA4, nkuA::argB; riboB2, stcJ::riboB; AN8387.4::AfpYrG</i>  |
| LO4011, LO4012                   | AN9244.4Δ        | <i>pyrG89; pyroA4, nkuA::argB; riboB2, stcJ::riboB; AN9244.4::AfpYrG</i>  |
| LO4016, LO4017, LO4018           | AN9245.4Δ        | <i>pyrG89; pyroA4, nkuA::argB; riboB2, stcJ::riboB; AN9245.4::AfpYrG</i>  |
| LO3829, LO3830, LO3831           | AN9246.4Δ        | <i>pyrG89; pyroA4, nkuA::argB; riboB2, stcJ::riboB; AN9246.4::AfpYrG</i>  |
| LO3824, LO3825, LO3826           | AN9247.4Δ        | <i>pyrG89; pyroA4, nkuA::argB; riboB2, stcJ::riboB; AN9247.4::AfpYrG</i>  |
| LO3819, LO3821                   | AN9248.4Δ        | <i>pyrG89; pyroA4, nkuA::argB; riboB2, stcJ::riboB; AN9248.4::AfpYrG</i>  |
| LO3814, LO3815, LO3816           | AN9249.4Δ        | <i>pyrG89; pyroA4, nkuA::argB; riboB2, stcJ::riboB; AN9249.4::AfpYrG</i>  |
| LO3809, LO3810, LO3811           | AN9250.4Δ        | <i>pyrG89; pyroA4, nkuA::argB; riboB2, stcJ::riboB; AN9250.4::AfpYrG</i>  |
| LO3804, LO3805, LO3806           | AN9251.4Δ        | <i>pyrG89; pyroA4, nkuA::argB; riboB2, stcJ::riboB; AN9251.4::AfpYrG</i>  |
| LO3799, LO3800, LO3801           | AN9252.4Δ        | <i>pyrG89; pyroA4, nkuA::argB; riboB2, stcJ::riboB; AN9252.4::AfpYrG</i>  |
| LO3794, LO3795                   | AN9253.4Δ        | <i>pyrG89; pyroA4, nkuA::argB; riboB2, stcJ::riboB; AN9253.4::AfpYrG</i>  |
| LO3790, LO3791                   | AN9254.4Δ        | <i>pyrG89; pyroA4, nkuA::argB; riboB2, stcJ::riboB; AN9254.4::AfpYrG</i>  |
| LO3784, LO3785, LO3786           | AN11214.4Δ       | <i>pyrG89; pyroA4, nkuA::argB; riboB2, stcJ::riboB; AN11214.4::AfpYrG</i> |
| LO3540, LO3541                   | AN11205.4Δ       | <i>pyrG89; pyroA4, nkuA::argB; riboB2, stcJ::riboB;</i>                   |

|                        |            |                                                                                                                            |
|------------------------|------------|----------------------------------------------------------------------------------------------------------------------------|
| LO3603, LO3604, LO3605 | AN9256.4Δ  | AN11205.4::Afp <sub>pyrG</sub><br><i>pyrG89; pyroA4, nkuA::argB; riboB2, stcJ::riboB;</i><br>AN9256.4::Afp <sub>pyrG</sub> |
| LO6199, LO6200, LO6201 | AN11647.4Δ | <i>pyrG89; pyroA4, nkuA::argB; riboB2, stcJ::riboB;</i><br>AN11647.4::Afp <sub>pyrG</sub>                                  |
| LO3434, LO3435         | AN9257.4Δ  | <i>pyrG89; pyroA4, nkuA::argB; riboB2, stcJ::riboB;</i><br>AN9257.4::Afp <sub>pyrG</sub>                                   |
| LO3458, LO3459, LO3460 | AN11217.4Δ | <i>pyrG89; pyroA4, nkuA::argB; riboB2, stcJ::riboB;</i><br>AN11217.4::Afp <sub>pyrG</sub>                                  |
| LO3453, LO3454, LO3455 | AN11206.4Δ | <i>pyrG89; pyroA4, nkuA::argB; riboB2, stcJ::riboB;</i><br>AN11206.4::Afp <sub>pyrG</sub>                                  |
| LO3289, LO3290, LO3291 | AN9259.4Δ  | <i>pyrG89; pyroA4, nkuA::argB; riboB2, stcJ::riboB;</i><br>AN9259.4::Afp <sub>pyrG</sub>                                   |
| LO3463, LO3464, LO3465 | AN11648.4Δ | <i>pyrG89; pyroA4, nkuA::argB; riboB2, stcJ::riboB;</i><br>AN11648.4::Afp <sub>pyrG</sub>                                  |
| LO3438, LO3439, LO3440 | AN9260.4Δ  | <i>pyrG89; pyroA4, nkuA::argB; riboB2, stcJ::riboB;</i><br>AN9260.4::Afp <sub>pyrG</sub>                                   |
| LO3443, LO3444, LO3445 | AN9261.4Δ  | <i>pyrG89; pyroA4, nkuA::argB; riboB2, stcJ::riboB;</i><br>AN9261.4::Afp <sub>pyrG</sub>                                   |
| LO3303, LO3304, LO3305 | AN8142.4Δ  | <i>pyrG89; pyroA4, nkuA::argB; riboB2, stcJ::riboB;</i><br>AN8142.4::Afp <sub>pyrG</sub>                                   |

---

<sup>a</sup>: LO2026 which carries *stcJ*Δ and *nkuA*Δ was used as the parental strain for generating deletants in this study.

**Table S2. Primers used in this study**

| primer     | Sequence (5'→3')                                              |
|------------|---------------------------------------------------------------|
| AN8376.4P1 | GTG GCT GAT CGG TAT GAG G                                     |
| AN8376.4P2 | AGT TGT TAT GCA GTG CAG TCG                                   |
| AN8376.4P3 | CGA AGA GGG TGA AGA GCA TTG TTC TTT TGT AGC GGG TTT CG        |
| AN8376.4P4 | GCA TCA GTG CCT CCT CTC AGA CAG GAT GCC ATA TGA CGA TTG ACC   |
| AN8376.4P5 | GAG TGC ACA AGG CTC TAC AGG                                   |
| AN8376.4P6 | GGA TCC CTT TTT CAT GAC ACC                                   |
| AN8377.4P1 | GTT TCT TGG GCT GAT TTT GC                                    |
| AN8377.4P2 | TGC ATC CAT TTT CTC ACT GC                                    |
| AN8377.4P3 | CGA AGA GGG TGA AGA GCA TTG CGC ACC CTA GAA GAC AAA GC        |
| AN8377.4P4 | GCA TCA GTG CCT CCT CTC AGA CAG TCC CCA GAT AAG CTC AGT GC    |
| AN8377.4P5 | ACG GAT ACG GCA ACA CTA CC                                    |
| AN8377.4P6 | GAT GGG CCA GCA GAT ATG AC                                    |
| AN8378.4P1 | AAG CAG CTC CCA GAA AGA AAG                                   |
| AN8378.4P2 | AAT GAG GAT ATG GGC TCT GC                                    |
| AN8378.4P3 | CGA AGA GGG TGA AGA GCA TTG AGC TCC ATG CTT GAA AAT GC        |
| AN8378.4P4 | GCA TCA GTG CCT CCT CTC AGA CAG GGG CCA TGT ATA CCC TAA TGC   |
| AN8378.4P5 | CCT GGA ACC AGA TCA AGA GC                                    |
| AN8378.4P6 | CAT TGG CAG ACT CAT GAT ACG                                   |
| AN8379.4P1 | GCA GGA CCC TTC ATT CTG C                                     |
| AN8379.4P2 | GCC ATG TAA CAG AAT CCA TCC                                   |
| AN8379.4P3 | CGA AGA GGG TGA AGA GCA TTG CAA GCT GAT TTG TCC CAT CC        |
| AN8379.4P4 | GCA TCA GTG CCT CCT CTC AGA CAG TCT CTG TAT GCC CGA GTT CC    |
| AN8379.4P5 | GGC AGG TCA TCT AGC ATT GG                                    |
| AN8379.4P6 | CGG TAA CAG TTG GGT ACA TGG                                   |
| AN8380.4P1 | AGA TGT CCG GCA TTA GCA AC                                    |
| AN8380.4P2 | TTC AGG AGC CTT GAG CGT AG                                    |
| AN8380.4P3 | CGA AGA GGG TGA AGA GCA TTG CGT AGT TGA TGC GTC GAA AG        |
| AN8380.4P4 | GCA TCA GTG CCT CCT CTC AGA CAG CAG GTG TGC AAA CAA AAA GG    |
| AN8380.4P5 | GGC CAT GAA GGA GAA ATG G                                     |
| AN8380.4P6 | CCA GGT TCT AGG CTC AGA GG                                    |
| AN8381.4P1 | GAA GCT CTC AGA TGC TAC TG                                    |
| AN8381.4P2 | CCA GTG ATA GGA CAC GTT AAG                                   |
| AN8381.4P3 | CGA AGA GGG TGA AGA GCA TTG CTA TGA CCG ACG GTT CTA AC        |
| AN8381.4P4 | GCA TCA GTG CCT CCT CTC AGA CAG GAA CCT TGT GAC TGA ATT ATG C |
| AN8381.4P5 | CTA ACT TTG CTT GTA GTG CTG                                   |
| AN8381.4P6 | GAC TTT CGA TCG TGG CTT TTG                                   |
| AN8382.4P1 | TGG GCA GGA TTA TGA AGT CG                                    |
| AN8382.4P2 | GAA GTC GTC CTA CCC GAA CC                                    |
| AN8382.4P3 | CGA AGA GGG TGA AGA GCA TTG GGA ATG CCC TAT GAT TTT GC        |
| AN8382.4P4 | GCA TCA GTG CCT CCT CTC AGA CAG AAA TGT GAG GGA GTG ATG TGC   |
| AN8382.4P5 | ACA ATT CGA AGC TGA AAC GC                                    |
| AN8382.4P6 | TTT GAA GCA AAA AGG GAA CC                                    |
| AN8383.4P1 | CGG TTT TTA GTT GGG TTT CG                                    |
| AN8383.4P2 | ATC TTG AGA ACG GCT TGT GC                                    |
| AN8383.4P3 | CGA AGA GGG TGA AGA GCA TTG GCC TGT ATA GGG CAA AGT GC        |
| AN8383.4P4 | GCA TCA GTG CCT CCT CTC AGA CAG AGT ATT TAG TGC CTA TCC TCG   |
| AN8383.4P5 | TAA CAA CGA TGC TGG TTT GG                                    |
| AN8383.4P6 | CAT ACT AAG CAG CGC AAT GG                                    |
| AN8384.4P1 | AAG CTC AAG AGG GGT TAC TGC                                   |
| AN8384.4P2 | CAA GAA TCC CCA ACC TAT TCC                                   |
| AN8384.4P3 | CGA AGA GGG TGA AGA GCA TTG GCA CTC ATC ACG GAG AGA CC        |

AN8384.4P4 GCA TCA GTG CCT CCT CTC AGA CAG TTC GGT CCG AGC TGT TTA TC  
 AN8384.4P5 CAT ATA GAG GCC GCA AGA CC  
 AN8384.4P6 CAG AAA GGC CGA GAA CAA AG  
 -----  
 AN8385.4P1 GGG GCC TCA ATG TAG ATT CC  
 AN8385.4P2 GTT GAA TTC GGC GAT GAG AC  
 AN8385.4P3 CGA AGA GGG TGA AGA GCA TTG GGG GAA CGA TCT CAG AAG TG  
 AN8385.4P4 GCA TCA GTG CCT CCT CTC AGA CAG ATT GAT ACC ACG CAC CTT CG  
 AN8385.4P5 GAG ACC CCG GTT CTA AGC TC  
 AN8385.4P6 AGG ATG GCG TCA CAA GCT AC  
 -----  
 AN11077.4P1 AGA AGG CGC TGT AGG TAT CG  
 AN11077.4P2 CGC ACT CAG GAA ACT CAA GG  
 AN11077.4P3 CGA AGA GGG TGA AGA GCA TTG TCG GTT CGA GCT TCT GTA GG  
 AN11077.4P4 GCA TCA GTG CCT CCT CTC AGA CAG AGA GCC TTG CAT TTG TAT TCG  
 AN11077.4P5 GGA ATG AAA AGG CCT GAA CC  
 AN11077.4P6 GAC CGA GAA GAC AAC CTT GG  
 -----  
 AN11085.4P1 GAG CCT TGC ATT TGT ATT CG  
 AN11085.4P2 GTC GTT CAA GCC GTA GTT AGG  
 AN11085.4P3 CGA AGA GGG TGA AGA GCA TTG GAC CGA GAA GAC AAC CTT GG  
 AN11085.4P4 GCA TCA GTG CCT CCT CTC AGA CAG GCG CGT ATA GAC CTG AGA CAC  
 AN11085.4P5 CCT TGT ACC AGG AAA TGC AAC  
 AN11085.4P6 GGG ATG TGT CGC ATT CTA GTC  
 -----  
 AN8387.4P1 GCT GGA ACG GTT ACA TCT GC  
 AN8387.4P2 AGC GGC TCA GAC TAC AAT GG  
 AN8387.4P3 CGA AGA GGG TGA AGA GCA TTG TGA TGT CTT TCG ATG CTT GC  
 AN8387.4P4 GCA TCA GTG CCT CCT CTC AGA CAG GGG AGG GGT ATT GTC TCA GG  
 AN8387.4P5 TAC TAA CCT CTG CCG GCT TG  
 AN8387.4P6 GCA ACG TCA TCT CCA AAT CC  
 -----  
 AN9244.4P1 GTT GCG GAT GAA GGA AAC C  
 AN9244.4P2 GCT CCA CCA GCT TTA GCC G  
 AN9244.4P3 CGA AGA GGG TGA AGA GCA TTG CGA TGC TAA CGT ACG GAC C  
 AN9244.4P4 GCA TCA GTG CCT CCT CTC AGA CAG GCT TGA TAG AGA TCA TTG  
 AN9244.4P5 CCT GCA TTC CCC AGA ATG C  
 AN9244.4P6 CCT GGT AGT TTG GCA CGC  
 -----  
 AN9245.4P1 CCA AGT GGG CTG GCA ATG TG  
 AN9245.4P2 GTCCAGATCGAATACTGTGTG  
 AN9245.4P3 CGA AGA GGG TGA AGA GCA TTG CAA GTG AGC GTG AAT CAT CTT  
 AN9245.4P4 GCA TCA GTG CCT CCT CTC AGA CAG CGG GAA CTC GGC TAA AGC TGC  
 AN9245.4P5 TTC AGT AAG CTC GTC ACC AC  
 AN9245.4P6 TTA CAA ACG ACG GCA ACA GC  
 -----  
 AN9246.4P1 GGT GCA CCC TGT TAT TTT GC  
 AN9246.4P2 GAA GTC ATC CTG CCA AAT GC  
 AN9246.4P3 CGA AGA GGG TGA AGA GCA TTG GGT AAC AGC CCC TAC CTT CC  
 AN9246.4P4 GCA TCA GTG CCT CCT CTC AGA CAG ACA CAT GTC CTC GAT CAT GC  
 AN9246.4P5 CTC GAC GTT GAG GTT TCA GC  
 AN9246.4P6 ACT TGA GTA TCC CGG AAT CG  
 -----  
 AN9247.4P1 CAA TGC TGG GTT GAA CTG C  
 AN9247.4P2 AAC TCT GTA GCA ATT TGC ATC G  
 AN9247.4P3 CGA AGA GGG TGA AGA GCA TTG GAA GGT AGG GGC TGT TAC CC  
 AN9247.4P4 GCA TCA GTG CCT CCT CTC AGA CAG GGC AGA TGG TCA GAT TAG GG  
 AN9247.4P5 AGT CGG GGA TCT TCT TAG CC  
 AN9247.4P6 GCC CTG GAA GAT TCT TTG C  
 -----  
 AN9248.4P1 CGG GCA AAC AGA CAA ATA TCC  
 AN9248.4P2 AAA TTT TGT CAG ACG ACC TTC C

AN92484P3 CGA AGA GGG TGA AGA GCA TTG TCT CAT GGC ATT GAT TCT TCC  
 AN9248.4P4 GCA TCA GTG CCT CCT CTC AGA CAG GCT GTC TTC TGT CCG CTA TTG  
 AN9248.4P5 AAT ACC GGT TAG AAG CGA AGC  
 AN9248.4P6 GGC TGA AGG ATC TCC AAT ACC  
 -----  
 AN9249.4P1 CGA GGA ACA GAA GGC TGT G  
 AN9249.4P2 TTG CGC TAT CGT CTC AAG C  
 AN9249.4P3 CGA AGA GGG TGA AGA GCA TTG GGA AAT CCC ATG CAC TAC G  
 AN9249.4P4 GCA TCA GTG CCT CCT CTC AGA CAG GGC TCA CAG ATG ATG GAA CC  
 AN9249.4P5 GGG GTT CAA GTC AGG ATG C  
 AN9249.4P6 TGG GAA TTG AAC TCG TCT CC  
 -----  
 AN9250.4P1 GCA AGA AGG CAG GAA ATA CG  
 AN9250.4P2 AGA GAC AAG CGA GGC TAT GG  
 AN9250.4P3 CGA AGA GGG TGA AGA GCA TTG CCA ATG AGT TGC AAA ACA CG  
 AN9250.4P4 GCA TCA GTG CCT CCT CTC AGA CAG ACC GGC GAG GTG TAT GTA TG  
 AN9250.4P5 CAA GGA GGA AGT TCG GGA AG  
 AN9250.4P6 AGA GGT CAT CCC AAG ATT GC  
 -----  
 AN9251.4P1 CAG CTG TTG GAG TTT TTC AGC  
 AN9251.4P2 TCA GCG CAA AAG ACA AAG C  
 AN9251.4P3 CGA AGA GGG TGA AGA GCA TTG TCC TCA ACT TTC GTG TTT TGC  
 AN9251.4P4 GCA TCA GTG CCT CCT CTC AGA CAG ACA CCC TTC CCT CAT AGC AG  
 AN9251.4P5 TGT GAC TCG TCC GAC TTG AC  
 AN9251.4P6 TGA ATA CTT CGC CGT GTG AC  
 -----  
 AN9252.4P1 CAC ATG AAC CAG GCA CTA GC  
 AN9252.4P2 GCG GTC GTT TTA TCA AGT GC  
 AN9252.4P3 CGA AGA GGG TGA AGA GCA TTG AAG CCA GCG AAA CTG TTG AC  
 AN9252.4P4 GCA TCA GTG CCT CCT CTC AGA CAG GCA CGC CTT TCC AAA ATA AG  
 AN9252.4P5 CGT ATT TCC TGC CTT CTT GC  
 AN9252.4P6 ATC TTT GCA AGT GGC CAG AG  
 -----  
 AN9253.4P1 AAC GGT TTG CTT CTG ACA CC  
 AN9253.4P2 CGG CAG TAC TCA CAA CAT GC  
 AN9253.4P3 CGA AGA GGG TGA AGA GCA TTG CGG TCA GGG ATA TTC ATA GGC  
 AN9253.4P4 GCA TCA GTG CCT CCT CTC AGA CAG TGG CCT TTG AGA ATG AGA CC  
 AN9253.4P5 TTG GTC GTT GGT GAA AAT AGG  
 AN9253.4P6 GGA CTG CAG AAG CAG TTG G  
 -----  
 AN9254.4P1 GTG GTA GCA CTC GAC TGA CC  
 AN9254.4P2 TTC AGC ATT ACG GCT CTG C  
 AN9254.4P3 CGA AGA GGG TGA AGA GCA TTG CTA GCG AGA CGG CTA CAA GG  
 AN9254.4P4 GCA TCA GTG CCT CCT CTC AGA CAG CGG TTA CTC TGG AAC CAT GC  
 AN9254.4P5 CAG GAG ACG CAA ACA ATT CC  
 AN9254.4P6 GTC CGC ATA TTC AGG AGA CG  
 -----  
 AN11214.4P1 TGA AGG AAC TGG GTT TGT CC  
 AN11214.4P2 CTC AGC AGA GGA GCA AGA GC  
 AN11214.4P3 CGA AGA GGG TGA AGA GCA TTG CCC TTT GGC TCC TAA TAT CG  
 AN11214.4P4 GCA TCA GTG CCT CCT CTC AGA CAG TCA CTA TAC CCG CCT TGA CC  
 AN11214.4P5 TGT AAC TGA TTC AAT CCC ATG C  
 AN11214.4P6 AGA CAT ATG GGG CCT TTG C  
 -----  
 AN11205.4P1 AAC TTT CTG CGC GCC TAC C  
 AN11205.4P2 CTC GAC TTG ATA TCT CCG TG  
 AN11205.4P3 CGT CAG ACA CAG AAT AAC TC TGT ACC TGT CAT AGC ATT AAG  
 AN11205.4P4 GCA TCA GTG CCT CCT CTC AGA CAG TCA GCC AGG AGG AGA TCG AG  
 AN11205.4P5 TCG CTG TCA CCT TCA CTA TG  
 AN11205.4P6 TAG GGT ACT GTT GGT GCA AG  
 -----  
 AN9256.4P1 TCG AGT CCA TTT TGG CCA AG



AN9256.4P2 CAC GCC ATG ATC ATC AGA G  
 AN9256.4P3 CGT CAG ACA CAG AAT AAC TC CAG CAT GCC GAC TCC AAG G  
 AN9256.4P4 GCA TCA GTG CCT CCT CTC AGA CAG CAG TAA AGC CAG CCA TCA ATG  
 AN9256.4P5 CAG TAC CAC GTC CCT TAG AA  
 AN9256.4P6 GAG GTT TTA ACG GAG GTT TTG

---

AN11647.4P1 AGT CGT CCT CGG CTTTCAC  
 AN11647.4P2 GTG TGC AGG AAA AAC CAC AC  
 AN11647.4P3 CGA AGA GGG TGA AGA GCA TTG TCT CCG TGT TGC ACA TCA AC  
 AN11647.4P4 GCA TCA GTG CCT CCT CTC AGA CAG CCA GAT CAT CAA CCA CCT G  
 AN11647.4P5 CCA ATG AGC AAG GCA TCG TG  
 AN11647.4P6 CTC CAG CAC TAG CCA GAA G

---

AN9257.4P1 TGG TTG ATG ATC TGG ACA GC  
 AN9257.4P2 ACG AGG ACT TGC AAA AGA GC  
 AN9257.4P3 CGA AGA GGG TGA AGA GCA TTG GGA ATG TTT GCG CAA CTA GC  
 AN9257.4P4 GCA TCA GTG CCT CCT CTC AGA CAG GGG TGG GAA ATC AGG AAA AG  
 AN9257.4P5 ACA GAC TGC TCT CCC TAC CG  
 AN9257.4P6 GAC TGC TCA CGA CAC TGC AC

---

AN11217.4P1 AAG ACG TCG GTC TCC ATG AC  
 AN11217.4P2 TGC TGG AGA CCT GGA GAT TC  
 AN11217.4P3 CGA AGA GGG TGA AGA GCA TTG TCA TCG CAT GTA ACC ACA GG  
 AN11217.4P4 GCA TCA GTG CCT CCT CTC AGA CAG CTT GTC TCG TGG CTT TTT CG  
 AN11217.4P5 CGA CTG GTG CTG TTG TAT GC  
 AN11217.4P6 GTG GTT TTT CCT GCA CAC G

---

AN11206.4P1 GGT CGA TCA TGA CAA TCA CG  
 AN11206.4P2 CAT ACC TAG GCT GTG CAT GG  
 AN11206.4P3 CGA AGA GGG TGA AGA GCA TTG CCT TGC TAT GTG CAT CAA CG  
 AN11206.4P4 GCA TCA GTG CCT CCT CTC AGA CAG TCA GAA CAG GCT GGA ATG TG  
 AN11206.4P5 GGC TGA AGC TGC TTA TCG TC  
 AN11206.4P6 CTA GTG AGC CGG CTT CAA AC

---

AN9259.4P1 GGA GAT ATT GCA AAG CAC ACC  
 AN9259.4P2 ACG CAC TGC ACT GTG TAT CC  
 AN9259.4P3 CGA AGA GGG TGA AGA GCA TTG CGG CAA TCA TGC ATC TAG G  
 AN9259.4P4 GCA TCA GTG CCT CCT CTC AGA CAG CTA GAT CGC TGG GAA GGT TG  
 AN9259.4P5 ACG TCT GGA CTT GGG ATG AG  
 AN9259.4P6 CTT GTG TCT TGG AAG CAT CG

---

AN11648.4P1 GCC CAC CAT AAT GTC AAA GC  
 AN11648.4P2 GCA GGT TCT GCG GTT ATA CG  
 AN11648.4P3 CGA AGA GGG TGA AGA GCA TTG TTT CGA TCC GTT CAT CTT CG  
 AN11648.4P4 GCA TCA GTG CCT CCT CTC AGA CAG CCC GAT TGC TTC TTG TAT GC  
 AN11648.4P5 GGC GCT GAT TAG TGT TTC G  
 AN11648.4P6 ATT TAC AGA GGC CCT GTT GG

---

AN9260.4P1 TCA GGA GAA GCT TTG GAA GG  
 AN9260.4P2 GAT TTG CCA GCA ACC ATC C  
 AN9260.4P3 CGA AGA GGG TGA AGA GCA TTG TTG GCA CAA TAG GCA ATC G  
 AN9260.4P4 GCA TCA GTG CCT CCT CTC AGA CAG ATA TTT ACG CCC AAA TCA TGC  
 AN9260.4P5 ACT TGA TCC TCG GGT TTT CC  
 AN9260.4P6 TCA GCA TGA TCG CCT AAC C

---

AN9261.4P1 TGG AAT CGG TTT GTC ATG G  
 AN9261.4P2 GGC GTA CGA TGT AGA TCA GG  
 AN9261.4P3 CGA AGA GGG TGA AGA GCA TTG CTT CTG TAA CCG CGT TGT CC  
 AN9261.4P4 GCA TCA GTG CCT CCT CTC AGA CAG TCA ATT AAC ACC CTG CGA TTC  
 AN9261.4P5 AGG GCA AAG GAC ATA TCA CG  
 AN9261.4P6 TTC CTG ACC AAG GAT TCA GAC

---

---

AN8142.4P1 ACC AGT ATG CCA AAA ACA AGG  
AN8142.4P2 CCC GAT TGT CCA TAG TAT TCG  
AN8142.4P3 CGA AGA GGG TGA AGA GCA TTG TAC CAC CTC GCA ATG TCT AGC  
AN8142.4P4 GCA TCA GTG CCT CCT CTC AGA CAG TGT ACG TTT GTG GCA TTT GG  
AN8142.4P5 GCT CGT AGG ACC ACA CAA GG  
AN8142.4P6 GGA AGA CCG TTT GTT GAA CG

---

Internal primer Used for diagnostic PCR  
PyrGR CGG GAG CAG CGT AGA TGC C  
PyrGF GAG TTA TTC TGT GTC TGA CG

---

Blue and red sequences are tails that anneal to the *A. fumigatus pyrG* fragment (*Afp<sub>pyrG</sub>*) during fusion PCR.

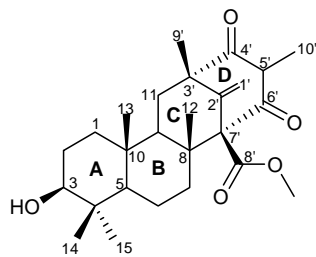

protoaustinoid A (**4**)

**Table S3.** NMR data for compound **4** (400 and 100 MHz in CDCl<sub>3</sub>)

| Position          | $\delta$ H (J in Hz)                                                                                              | $\delta$ C             |
|-------------------|-------------------------------------------------------------------------------------------------------------------|------------------------|
| 1                 | H <sub><math>\alpha</math></sub> : 0.66, td<br>(13.2, 4.0)<br>H <sub><math>\beta</math></sub> : 1.50, m           | 38.3, CH <sub>2</sub>  |
| 2                 | 1.50, m                                                                                                           | 26.9, CH <sub>2</sub>  |
| 3                 | 3.11, dd (11.2, 4.4)                                                                                              | 78.3, CH               |
| 4                 | —                                                                                                                 | 38.3, C                |
| 5                 | 0.56, dd (6.0, 2.0)                                                                                               | 54.4, CH               |
| 6                 | 1.55, m                                                                                                           | 18.2, CH <sub>2</sub>  |
| 7                 | H <sub><math>\alpha</math></sub> : 2.24, td (14.0, 4.0)<br>H <sub><math>\beta</math></sub> : 2.13, dt (14.0, 3.2) | 33.1, CH <sub>2</sub>  |
| 8                 | —                                                                                                                 | 47.0, C                |
| 9                 | 0.56, dd (12.4, 3.2)                                                                                              | 51.9, CH               |
| 10                | —                                                                                                                 | 37.5, C                |
| 11                | H <sub><math>\alpha</math></sub> : 1.60, m<br>H <sub><math>\beta</math></sub> : 1.92, dd<br>(12.4, 3.2)           | 37.7, CH <sub>2</sub>  |
| 12                | 1.21, s                                                                                                           | 17.6, CH <sub>3</sub>  |
| 13                | 0.78, s                                                                                                           | 15.9, CH <sub>3</sub>  |
| 14                | 0.73, s                                                                                                           | 15.5, CH <sub>3</sub>  |
| 15                | 0.94, s                                                                                                           | 27.8, CH <sub>3</sub>  |
| 1'                | H <sub><math>\alpha</math></sub> : 4.82, brs<br>H <sub><math>\beta</math></sub> : 5.29, brs                       | 112.0, CH <sub>2</sub> |
| 2'                | —                                                                                                                 | 146.8, C               |
| 3'                | —                                                                                                                 | 52.2, C                |
| 4'                | —                                                                                                                 | 209.4, C               |
| 5'                | 3.91, q (6.4)                                                                                                     | 62.5, CH               |
| 6'                | —                                                                                                                 | 204.1, C               |
| 7'                | —                                                                                                                 | 73.0, C                |
| 8'                | —                                                                                                                 | 169.2, C               |
| 9'                | 1.37, s                                                                                                           | 21.4, CH <sub>3</sub>  |
| 10'               | 1.19, s                                                                                                           | 6.5, CH <sub>3</sub>   |
| -OCH <sub>3</sub> | 3.67, s                                                                                                           | 52.0, CH <sub>3</sub>  |

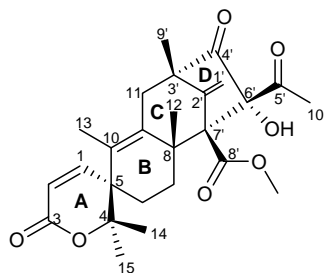

preaustinoid A4 (**6**)

**Table S4.** NMR data for compound **6** (400 and 100 MHz in CDCl<sub>3</sub>)

| Position          | $\delta$ H ( <i>J</i> in Hz)                               | $\delta$ C             | HMBC <sup>a</sup>           | COSY                                                        | NOESY                                                                                         |
|-------------------|------------------------------------------------------------|------------------------|-----------------------------|-------------------------------------------------------------|-----------------------------------------------------------------------------------------------|
| 1                 | 6.73, d (10.0)                                             | 147.2, CH              | 3, 4, 5, 6                  | H-2                                                         | H-2, H <sub><math>\alpha</math></sub> -7                                                      |
| 2                 | 6.01, d (10.0)                                             | 118.8, CH              | 3, 5                        | H-1                                                         | H-1                                                                                           |
| 3                 | —                                                          | 164.2, C               |                             |                                                             |                                                                                               |
| 4                 | —                                                          | 85.7, C                |                             |                                                             |                                                                                               |
| 5                 | —                                                          | 45.5, C                |                             |                                                             |                                                                                               |
| 6                 | 1.60, m                                                    | 27.4, CH <sub>2</sub>  | 1, 5, 7                     | H <sub>2</sub> -7                                           | H <sub>2</sub> -7, H <sub>3</sub> -12,<br>H <sub>3</sub> -15                                  |
| 7                 | H <sub><math>\alpha</math></sub> : 3.11, dt (13.6,<br>4.4) | 27.3, CH <sub>2</sub>  | 5, 6, 8, 12                 | H <sub>2</sub> -6, H <sub><math>\beta</math></sub> -7       | H-1, H <sub>2</sub> -6, H <sub><math>\beta</math></sub> -7                                    |
|                   | H <sub><math>\beta</math></sub> : 1.04, dt (13.6,<br>3.6)  |                        | 8, 12                       | H <sub>2</sub> -6, H <sub><math>\alpha</math></sub> -7      | H <sub>2</sub> -6, H <sub><math>\alpha</math></sub> -7,<br>H <sub>3</sub> -12                 |
| 8                 | —                                                          | 45.6, C                |                             |                                                             |                                                                                               |
| 9                 | —                                                          | 135.3, C               |                             |                                                             |                                                                                               |
| 10                | —                                                          | 129.5, C               |                             |                                                             |                                                                                               |
| 11                | H <sub><math>\alpha</math></sub> : 2.86, d (14.4)          | 43.0, CH <sub>2</sub>  | 9, 10, 3', 4'               | H <sub><math>\beta</math></sub> -11                         | H <sub><math>\beta</math></sub> -11, H <sub>3</sub> -13,<br>H <sub>3</sub> -9'                |
|                   | H <sub><math>\beta</math></sub> : 2.28, dd (14.4,<br>1.6)  |                        | 8, 9, 10, 2',<br>3', 4', 9' | H <sub><math>\alpha</math></sub> -11,<br>H <sub>3</sub> -13 | H <sub><math>\alpha</math></sub> -11, H <sub>3</sub> -12,<br>H <sub>3</sub> -9'               |
| 12                | 1.39 s                                                     | 24.0, CH <sub>3</sub>  | 7, 8, 9, 10, 7'             |                                                             | H <sub>2</sub> -6, H <sub><math>\beta</math></sub> -7,<br>H <sub><math>\beta</math></sub> -11 |
| 13                | 1.55, d (1.6)                                              | 15.2, CH <sub>3</sub>  | 5, 9, 10                    | H <sub><math>\beta</math></sub> -11                         | H <sub><math>\alpha</math></sub> -11, H <sub>3</sub> -14<br>H <sub>3</sub> -13                |
| 14                | 1.24, s                                                    | 23.0, CH <sub>3</sub>  | 4, 5                        |                                                             | H <sub>2</sub> -6                                                                             |
| 15                | 1.35, s                                                    | 25.7, CH <sub>3</sub>  | 4, 5                        |                                                             | H <sub>b</sub> -1'                                                                            |
| 1'                | H <sub><math>\alpha</math></sub> : 5.90, br s              | 109.6, CH <sub>2</sub> | 2', 3', 7'                  |                                                             | H <sub>a</sub> -1', H <sub>3</sub> -9'                                                        |
|                   | H <sub><math>\beta</math></sub> : 5.34, br s               |                        | 2', 3', 7'                  |                                                             |                                                                                               |
| 2'                | —                                                          | 146.5, C               |                             |                                                             |                                                                                               |
| 3'                | —                                                          | 54.9, C                |                             |                                                             |                                                                                               |
| 4'                | —                                                          | 211.1, C               |                             |                                                             |                                                                                               |
| 5'                | —                                                          | 201.3, C               |                             |                                                             |                                                                                               |
| 6'                | —                                                          | 92.9, C                |                             |                                                             |                                                                                               |
| 7'                | —                                                          | 65.8, C                |                             |                                                             |                                                                                               |
| 8'                | —                                                          | 169.5, C               |                             |                                                             |                                                                                               |
| 9'                | 1.27, s                                                    | 16.3, CH <sub>3</sub>  | 11, 2', 3', 4'              |                                                             | H <sub>2</sub> -11, H <sub>b</sub> -1',<br>H <sub>3</sub> -10'                                |
| 10'               | 2.02, s                                                    | 26.7, CH <sub>3</sub>  | 5', 6'                      |                                                             | H <sub>3</sub> -9'                                                                            |
| -OCH <sub>3</sub> | 3.70, s                                                    | 54.9, CH <sub>3</sub>  | 8'                          |                                                             |                                                                                               |
| -OH               | 4.68, bs                                                   |                        |                             |                                                             |                                                                                               |

<sup>a</sup>: HMBC correlations are from proton(s) to the indicated carbon.

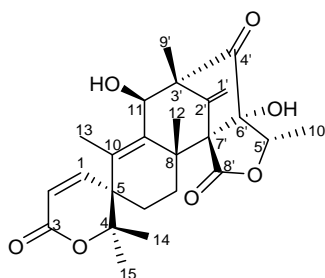

11 $\beta$ -hydroxyisoaustinone (**8**)

**Table S5.** NMR data for compound **8** (400 and 100 MHz in DMSO-*d*<sub>6</sub>)

| Position | $\delta$ H (J in Hz)                                                                                 | $\delta$ C                | HMBC <sup>a</sup>                | COSY                                                                                                               | NOESY                                                                                  |
|----------|------------------------------------------------------------------------------------------------------|---------------------------|----------------------------------|--------------------------------------------------------------------------------------------------------------------|----------------------------------------------------------------------------------------|
| 1        | 6.55, d (10.0)                                                                                       | 148.1, CH                 | 3, 4, 5, 14                      | H-2                                                                                                                | H-2                                                                                    |
| 2        | 5.97, d (10.0)                                                                                       | 117.9, CH                 | 3, 5                             | H-1                                                                                                                | H-1                                                                                    |
| 3        | —                                                                                                    | 163.4, C                  |                                  |                                                                                                                    |                                                                                        |
| 4        | —                                                                                                    | 85.6, C                   |                                  |                                                                                                                    |                                                                                        |
| 5        | —                                                                                                    | 45.2, C                   |                                  |                                                                                                                    |                                                                                        |
| 6        | H <sub><math>\alpha</math></sub> : 1.50, m<br>H <sub><math>\beta</math></sub> : 1.74, td (14.0, 3.6) | 26.2, CH <sub>2</sub>     | 5<br>1, 4, 5, 9, 10              | H <sub><math>\beta</math></sub> -6, H <sub>2</sub> -7<br>H <sub><math>\alpha</math></sub> -6,<br>H <sub>2</sub> -7 | H <sub>3</sub> -12                                                                     |
| 7        | H <sub><math>\alpha</math></sub> : 1.45, m<br>H <sub><math>\beta</math></sub> : 2.73, td (14.0, 3.6) | 26.2, CH <sub>2</sub>     | 5, 6                             | H <sub>2</sub> -6, H <sub><math>\beta</math></sub> -7<br>H <sub>2</sub> -6,<br>H <sub><math>\alpha</math></sub> -7 | H <sub>3</sub> -12                                                                     |
| 8        | —                                                                                                    | 40.3, C                   |                                  |                                                                                                                    |                                                                                        |
| 9        | —                                                                                                    | 139.7, C                  |                                  |                                                                                                                    |                                                                                        |
| 10       | —                                                                                                    | 131.3, C                  |                                  |                                                                                                                    |                                                                                        |
| 11       | 4.25, d (4.8)                                                                                        | 74.1, CH                  | 8, 9, 10, 13, 2', 3', 4'         | OH-11                                                                                                              | H <sub>3</sub> -13, OH-11                                                              |
| 12       | 1.46, s                                                                                              | 23.4, CH <sub>3</sub>     | 7, 8, 9, 7'                      |                                                                                                                    | H <sub><math>\beta</math></sub> -6, H <sub><math>\beta</math></sub> -7,<br>OH-11       |
| 13       | 1.54, s                                                                                              | 13.8, CH <sub>3</sub>     | 5, 9, 10                         |                                                                                                                    | H-11, H <sub>3</sub> -14                                                               |
| 14       | 1.26, s                                                                                              | 22.8, CH <sub>3</sub>     | 4, 5, 15                         |                                                                                                                    | H <sub>3</sub> -13                                                                     |
| 15       | 1.30, s                                                                                              | 25.7, CH <sub>3</sub>     | 4, 5, 14                         |                                                                                                                    |                                                                                        |
| 1'       | H <sub><math>a</math></sub> : 5.03, br s<br>H <sub><math>b</math></sub> : 5.15, br s                 | 108.9,<br>CH <sub>2</sub> | 2', 3', 4', 7'<br>2', 3', 4', 7' |                                                                                                                    | H <sub><math>b</math></sub> -1'<br>H <sub><math>a</math></sub> -1', H <sub>3</sub> -9' |
| 2'       | —                                                                                                    | 144.3, C                  |                                  |                                                                                                                    |                                                                                        |
| 3'       | —                                                                                                    | 61.8, C                   |                                  |                                                                                                                    |                                                                                        |
| 4'       | —                                                                                                    | 210.3, C                  |                                  |                                                                                                                    |                                                                                        |
| 5'       | 4.37, q (6.4)                                                                                        | 77.0, CH                  | 4', 6', 10'                      | H <sub>3</sub> -10'                                                                                                | H <sub>3</sub> -10'                                                                    |
| 6'       | —                                                                                                    | 90.8, C                   |                                  |                                                                                                                    |                                                                                        |
| 7'       | —                                                                                                    | 65.8, C                   |                                  |                                                                                                                    |                                                                                        |
| 8'       | —                                                                                                    | 172.4, C                  |                                  |                                                                                                                    |                                                                                        |
| 9'       | 1.18, s                                                                                              | 13.2, CH <sub>3</sub>     | 11, 2', 3', 4'                   |                                                                                                                    | H <sub><math>b</math></sub> -1'                                                        |
| 10'      | 1.13, d (6.4)                                                                                        | 13.0, CH                  | 5', 6'                           | H-5'                                                                                                               | H <sub>3</sub> -5', OH-6'                                                              |
| 6'-OH    | 6.68, bs                                                                                             | —                         | 4', 6', 7'                       |                                                                                                                    | H <sub>3</sub> -10'                                                                    |
| 11-OH    | 5.66, d (4.8)                                                                                        | —                         | 9, 11, 3'                        | H-11                                                                                                               | H-11, H <sub>3</sub> -12,                                                              |

<sup>a</sup>: HMBC correlations are from proton(s) to the indicated carbon.

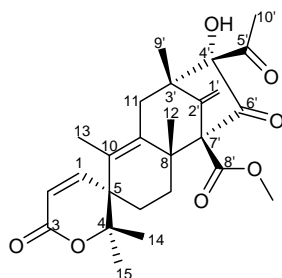

preautinoid A5 (**10**)

**Table S6.** NMR data for compound **10** (400 and 100 MHz in CDCl<sub>3</sub>)

| Position         | $\delta$ H (J in Hz)                                                           | $\delta$ C             | HMBC <sup>a</sup>                     | COSY                                                                         | NOESY                                                                                                |
|------------------|--------------------------------------------------------------------------------|------------------------|---------------------------------------|------------------------------------------------------------------------------|------------------------------------------------------------------------------------------------------|
| 1                | 6.34, d (10.0)                                                                 | 146.5, CH              | 3, 4                                  | H-2                                                                          | H-2                                                                                                  |
| 2                | 6.02, d (10.0)                                                                 | 119.2, CH              | 3, 4, 5                               | H-1                                                                          | H-1                                                                                                  |
| 3                | —                                                                              | 164.2, C               |                                       |                                                                              |                                                                                                      |
| 4                | —                                                                              | 85.7, C                |                                       |                                                                              |                                                                                                      |
| 5                | —                                                                              | 45.5, C                |                                       |                                                                              |                                                                                                      |
| 6                | 1.59, m                                                                        | 26.6, CH <sub>2</sub>  | 5, 7, 8                               | H <sub>2</sub> -7                                                            | H <sub>2</sub> -7                                                                                    |
| 7                | H <sub>a</sub> : 2.00, td (14.0, 1.6)<br>H <sub>b</sub> : 1.79, dt (14.0, 3.6) | 24.5, CH <sub>2</sub>  | 6, 8<br>6, 8, 12                      | H <sub>2</sub> -6, H <sub>β</sub> -7<br>H <sub>2</sub> -6, H <sub>α</sub> -7 | H <sub>2</sub> -6, H <sub>β</sub> -7<br>H <sub>2</sub> -6, H <sub>α</sub> -7, H <sub>3</sub> -12     |
| 8                | —                                                                              | 47.2, C                |                                       |                                                                              |                                                                                                      |
| 9                | —                                                                              | 136.1, C               |                                       |                                                                              |                                                                                                      |
| 10               | —                                                                              | 131.0, C               |                                       |                                                                              |                                                                                                      |
| 11               | H <sub>a</sub> : 2.00, dq (14.4, 1.2)<br>H <sub>β</sub> : 3.05, d (14.4)       | 40.6, CH <sub>2</sub>  | 9, 10, 3', 4'<br>8, 9, 10, 2', 3', 9' | H <sub>β</sub> -11, H <sub>3</sub> -13<br>H <sub>α</sub> -11                 | H <sub>β</sub> -11, H <sub>3</sub> -9'<br>H <sub>α</sub> -11, H <sub>3</sub> -13, H <sub>3</sub> -9' |
| 12               | 1.48, s                                                                        | 21.7, CH <sub>3</sub>  | 7, 8, 9, 7'                           |                                                                              | H <sub>β</sub> -7                                                                                    |
| 13               | 1.69, d (1.2)                                                                  | 15.2, CH <sub>3</sub>  | 5, 9, 10                              | H <sub>α</sub> -11                                                           | H <sub>β</sub> -11, H <sub>3</sub> -14                                                               |
| 14               | 1.25, s                                                                        | 23.1, CH <sub>3</sub>  | 4, 5                                  |                                                                              | H <sub>3</sub> -13                                                                                   |
| 15               | 1.36, s                                                                        | 25.8, CH <sub>3</sub>  | 4, 5                                  |                                                                              |                                                                                                      |
| 1'               | H <sub>a</sub> : 5.15, s<br>H <sub>b</sub> : 5.36, s                           | 108.1, CH <sub>2</sub> | 2', 3', 7'<br>3', 7'                  |                                                                              | H <sub>b</sub> -1',<br>H <sub>a</sub> -1', H <sub>3</sub> -9'                                        |
| 2'               | —                                                                              | 149.6, C               |                                       |                                                                              |                                                                                                      |
| 3'               | —                                                                              | 50.1, C                |                                       |                                                                              |                                                                                                      |
| 4'               | —                                                                              | 92.2, C                |                                       |                                                                              |                                                                                                      |
| 5'               | —                                                                              | 202.6, C               |                                       |                                                                              |                                                                                                      |
| 6'               | —                                                                              | 207.4, C               |                                       |                                                                              |                                                                                                      |
| 7'               | —                                                                              | 71.5, C                |                                       |                                                                              |                                                                                                      |
| 8'               | —                                                                              | 167.7, C               |                                       |                                                                              |                                                                                                      |
| 9'               | 1.06, s                                                                        | 16.3, CH <sub>3</sub>  | 11, 2', 3', 4'                        |                                                                              | H <sub>β</sub> -11, H <sub>b</sub> -1', H <sub>3</sub> -10'                                          |
| 10'              | 2.21, s                                                                        | 28.2, CH <sub>3</sub>  | 4', 5'                                |                                                                              | H <sub>3</sub> -9'                                                                                   |
| OCH <sub>3</sub> | 3.76, s                                                                        | 52.4, CH <sub>3</sub>  | 8'                                    |                                                                              |                                                                                                      |
| OH               | 4.56, bs                                                                       |                        | 3', 4', 5'                            |                                                                              |                                                                                                      |

<sup>a</sup>: HMBC correlations are from proton(s) to the indicated carbon.

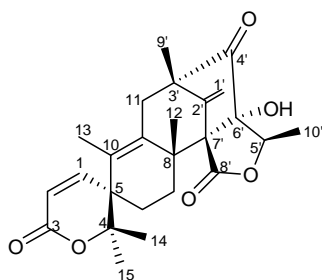

(5'R)-isoaustinone (**12**)

**Table S7.** NMR data for compound **12** (400 and 100 MHz in CDCl<sub>3</sub>)

| Position | $\delta$ H (J in Hz)                                                                                              | $\delta$ C             | HMBC <sup>a</sup>                                       | COSY                                                                                                            | NOESY                                                                                                                                   |
|----------|-------------------------------------------------------------------------------------------------------------------|------------------------|---------------------------------------------------------|-----------------------------------------------------------------------------------------------------------------|-----------------------------------------------------------------------------------------------------------------------------------------|
| 1        | 6.53, d (10.0)                                                                                                    | 146.7, CH              | 3, 4, 5, 6                                              | H-2                                                                                                             | H-2                                                                                                                                     |
| 2        | 6.02, d (10.0)                                                                                                    | 119.4, CH              | 3, 5                                                    | H-1                                                                                                             | H-1                                                                                                                                     |
| 3        | —                                                                                                                 | 164.0, C               |                                                         |                                                                                                                 |                                                                                                                                         |
| 4        | —                                                                                                                 | 85.9, C                |                                                         |                                                                                                                 |                                                                                                                                         |
| 5        | —                                                                                                                 | 45.6, C                |                                                         |                                                                                                                 |                                                                                                                                         |
| 6        | 1.62, m                                                                                                           | 27.1, CH <sub>2</sub>  | 1, 2, 5, 7, 9, 10                                       | H <sub>2</sub> -7                                                                                               | H <sub>2</sub> -7                                                                                                                       |
| 7        | H <sub><math>\alpha</math></sub> : 2.60, td (13.6, 4.4)<br>H <sub><math>\beta</math></sub> : 1.80, dt (13.6, 3.6) | 26.2, CH <sub>2</sub>  | 6, 8, 12, 7'                                            | H <sub>2</sub> -6, H <sub><math>\beta</math></sub> -7<br>H <sub>2</sub> -6, H <sub><math>\alpha</math></sub> -7 | H <sub>2</sub> -6, H <sub><math>\beta</math></sub> -7<br>H <sub>2</sub> -6, H <sub><math>\alpha</math></sub> -7                         |
| 8        | —                                                                                                                 | 41.5, C                |                                                         |                                                                                                                 |                                                                                                                                         |
| 9        | —                                                                                                                 | 136.5, C               |                                                         |                                                                                                                 |                                                                                                                                         |
| 10       | —                                                                                                                 | 129.5, C               |                                                         |                                                                                                                 |                                                                                                                                         |
| 11       | H <sub><math>\alpha</math></sub> : 2.89, d (14.4)<br>H <sub><math>\beta</math></sub> : 2.28, dd (14.4, 2.0)       | 42.9, CH <sub>2</sub>  | 3, 8, 9, 10,<br>2', 3', 4', 9',<br>9, 10, 2', 3',<br>4' | H <sub><math>\beta</math></sub> -11<br>H <sub><math>\alpha</math></sub> -11, H <sub>3</sub> -13                 | H <sub>3</sub> -9', H <sub><math>\beta</math></sub> -11, H <sub>3</sub> -13<br>H <sub>3</sub> -12, H <sub><math>\alpha</math></sub> -11 |
| 12       | 1.43, d (0.8)                                                                                                     | 22.2, CH <sub>3</sub>  | 8, 9, 7'                                                |                                                                                                                 | H <sub><math>\beta</math></sub> -11                                                                                                     |
| 13       | 1.57, d (1.6)                                                                                                     | 15.2, CH <sub>3</sub>  | 5, 9, 10                                                | H <sub><math>\beta</math></sub> -11                                                                             | H <sub><math>\alpha</math></sub> -11                                                                                                    |
| 14       | 1.24, s                                                                                                           | 23.1, CH <sub>3</sub>  | 4, 5                                                    |                                                                                                                 |                                                                                                                                         |
| 15       | 1.37, s                                                                                                           | 25.7, CH <sub>3</sub>  | 4, 5                                                    |                                                                                                                 |                                                                                                                                         |
| 1'       | H <sub><math>\alpha</math></sub> : 5.27, d (0.8)<br>H <sub><math>\beta</math></sub> : 5.30, d (0.8)               | 108.9, CH <sub>2</sub> | 11, 2', 3', 4', 7',<br>11, 2', 3', 4', 7'               | H <sub><math>\beta</math></sub> -1'<br>H <sub><math>\alpha</math></sub> -1'                                     | H <sub>3</sub> -9'                                                                                                                      |
| 2'       | —                                                                                                                 | 147.3, C               |                                                         |                                                                                                                 |                                                                                                                                         |
| 3'       | —                                                                                                                 | 55.6, C                |                                                         |                                                                                                                 |                                                                                                                                         |
| 4'       | —                                                                                                                 | 214.0, C               |                                                         |                                                                                                                 |                                                                                                                                         |
| 5'       | 4.46, q (6.8)                                                                                                     | 84.5, CH               | 6', 8'                                                  | H <sub>3</sub> -10'                                                                                             | H <sub>3</sub> -10'                                                                                                                     |
| 6'       | —                                                                                                                 | 90.7, C                |                                                         |                                                                                                                 |                                                                                                                                         |
| 7'       | —                                                                                                                 | 64.5, C                |                                                         |                                                                                                                 |                                                                                                                                         |
| 8'       | —                                                                                                                 | 172.1, C               |                                                         |                                                                                                                 |                                                                                                                                         |
| 9'       | 1.26, s                                                                                                           | 14.8, CH <sub>3</sub>  | 2', 3', 4', 11                                          |                                                                                                                 | H <sub><math>\beta</math></sub> -1'                                                                                                     |
| 10'      | 1.15, d (6.8)                                                                                                     | 18.1, CH <sub>3</sub>  | 5', 6'                                                  | H-5'                                                                                                            | H-5'                                                                                                                                    |
| OH       | 2.96, bs                                                                                                          | —                      |                                                         |                                                                                                                 |                                                                                                                                         |

<sup>a</sup>: HMBC correlations are from proton(s) to the indicated carbon.

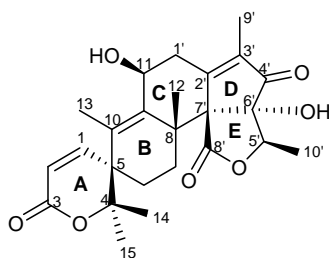

neo-austinone (**13**)

**Table S8.** NMR data for compound **13** (400 and 100 MHz in CDCl<sub>3</sub>)

| Position | $\delta$ H (J in Hz)                                                                                              | $\delta$ C            | HMBC <sup>a</sup>           | COSY                                                                                                            | NOESY                                                                                                                          |
|----------|-------------------------------------------------------------------------------------------------------------------|-----------------------|-----------------------------|-----------------------------------------------------------------------------------------------------------------|--------------------------------------------------------------------------------------------------------------------------------|
| 1        | 6.42, d (9.6)                                                                                                     | 147.4, CH             | 3, 4, 5, 6                  | H-2                                                                                                             | H-2, H <sub><math>\alpha</math></sub> -7                                                                                       |
| 2        | 5.95, d (9.6)                                                                                                     | 118.6, CH             | 3, 5                        | H-1                                                                                                             | H-1                                                                                                                            |
| 3        | —                                                                                                                 | 164.8, C              |                             |                                                                                                                 |                                                                                                                                |
| 4        | —                                                                                                                 | 86.1, C               |                             |                                                                                                                 |                                                                                                                                |
| 5        | —                                                                                                                 | 45.5, C               |                             |                                                                                                                 |                                                                                                                                |
| 6        | H <sub><math>\alpha</math></sub> : 1.63, m<br>H <sub><math>\beta</math></sub> : 1.86, td (12.8, 3.6)              | 25.9, CH <sub>2</sub> | 5<br>1, 4, 5                | H <sub><math>\beta</math></sub> -6, H <sub>2</sub> -7<br>H <sub><math>\alpha</math></sub> -6, H <sub>2</sub> -7 | H-1, H <sub><math>\beta</math></sub> -6, H <sub><math>\beta</math></sub> -7, H-5'<br>H <sub><math>\alpha</math></sub> -6, H-11 |
| 7        | H <sub><math>\alpha</math></sub> : 2.81, td (12.8, 3.6)<br>H <sub><math>\beta</math></sub> : 1.72, dt (12.8, 3.6) | 28.3, CH <sub>2</sub> | 5, 8                        | H <sub>2</sub> -6, H <sub><math>\beta</math></sub> -7<br>H <sub>2</sub> -6, H <sub><math>\alpha</math></sub> -7 | H-1, H <sub><math>\beta</math></sub> -7, H-5'<br>H <sub><math>\alpha</math></sub> -6, H <sub><math>\alpha</math></sub> -7      |
| 8        | —                                                                                                                 | 40.3, C               |                             |                                                                                                                 |                                                                                                                                |
| 9        | —                                                                                                                 | 142.0, C              |                             |                                                                                                                 |                                                                                                                                |
| 10       | —                                                                                                                 | 134.5, C              |                             |                                                                                                                 |                                                                                                                                |
| 11       | 5.16, dt (6.8, 4.4)                                                                                               | 67.6, CH              | 9, 10, 2'                   | H <sub>2</sub> -1'                                                                                              | H <sub>3</sub> -13, H <sub>2</sub> -1'                                                                                         |
| 12       | 1.62, s                                                                                                           | 30.4, CH <sub>3</sub> | 7, 8, 9, 7'                 |                                                                                                                 | H <sub><math>\beta</math></sub> -1'                                                                                            |
| 13       | 1.83, s                                                                                                           | 15.5, CH <sub>3</sub> | 5, 9, 10                    |                                                                                                                 | H-11                                                                                                                           |
| 14*      | 1.40, s                                                                                                           | 23.2, CH <sub>3</sub> | 4, 5, 15                    |                                                                                                                 |                                                                                                                                |
| 15*      | 1.40, s                                                                                                           | 25.6, CH <sub>3</sub> | 4, 5, 14                    |                                                                                                                 |                                                                                                                                |
| 1'       | H <sub><math>\alpha</math></sub> : 3.02, dd (14.0, 4.4)<br>H <sub><math>\beta</math></sub> : 3.23 dd (14.0, 4.4)  | 34.7, CH <sub>2</sub> | 9, 11, 2', 7'<br>11, 2', 3' | H-11, H <sub><math>\beta</math></sub> -1'<br>H-11, H <sub><math>\alpha</math></sub> -1'                         | H-11, H <sub><math>\beta</math></sub> -1'<br>H-11, H <sub><math>\alpha</math></sub> -1'                                        |
| 2'       | —                                                                                                                 | 169.9, C              |                             |                                                                                                                 |                                                                                                                                |
| 3'       | —                                                                                                                 | 137.2, C              |                             |                                                                                                                 |                                                                                                                                |
| 4'       | —                                                                                                                 | 203.4, C              |                             |                                                                                                                 |                                                                                                                                |
| 5'       | 4.70, q (6.4)                                                                                                     | 79.4, CH              | 4', 6', 10'                 | H <sub>3</sub> -10'                                                                                             | H <sub>2</sub> -7, H <sub>3</sub> -10'                                                                                         |
| 6'       | —                                                                                                                 | 85.4, C               |                             |                                                                                                                 |                                                                                                                                |
| 7'       | —                                                                                                                 | 61.6, C               |                             |                                                                                                                 |                                                                                                                                |
| 8'       | —                                                                                                                 | 173.0, C              |                             |                                                                                                                 |                                                                                                                                |
| 9'       | 1.79, brs                                                                                                         | 8.4, CH <sub>3</sub>  | 2', 3', 4'                  | H <sub><math>\beta</math></sub> -1'                                                                             |                                                                                                                                |
| 10'      | 1.47, d (6.4)                                                                                                     | 15.2, CH <sub>3</sub> | 5', 6'                      | H-5'                                                                                                            | H-5'                                                                                                                           |
| 6'-OH    | 3.61, s                                                                                                           |                       |                             |                                                                                                                 |                                                                                                                                |
| 11-OH    | 1.92 d (6.8)                                                                                                      |                       |                             |                                                                                                                 |                                                                                                                                |

<sup>a</sup>: HMBC correlations are from proton(s) to the indicated carbon.



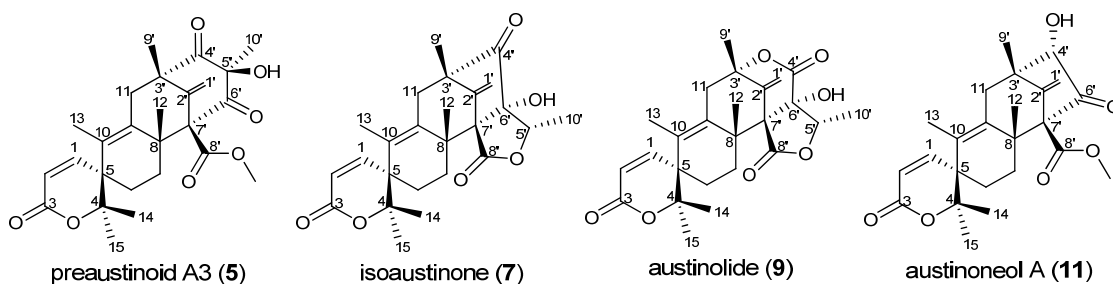

**Table S9.**  $^1\text{H}$  NMR data for compound **5**, **7**, **9**, **11** (400 MHz in  $\text{CDCl}_3$ )

| Position         | $\delta$ H ( <i>J</i> in Hz)                                                         |                                                                                       |                                                                                      |                                                                                |
|------------------|--------------------------------------------------------------------------------------|---------------------------------------------------------------------------------------|--------------------------------------------------------------------------------------|--------------------------------------------------------------------------------|
|                  | <b>5</b>                                                                             | <b>7</b>                                                                              | <b>9</b>                                                                             | <b>11</b>                                                                      |
| 1                | 6.36, d (9.6)                                                                        | 6.57, d (10.0)                                                                        | 6.70, d (10.0)                                                                       | 6.41, d (10.0)                                                                 |
| 2                | 6.03, d (9.6)                                                                        | 6.02, d (10.0)                                                                        | 6.06, d (10.0)                                                                       | 6.04, d (10.0)                                                                 |
| 3                | —                                                                                    | —                                                                                     | —                                                                                    | —                                                                              |
| 4                | —                                                                                    | —                                                                                     | —                                                                                    | —                                                                              |
| 5                | —                                                                                    | —                                                                                     | —                                                                                    | —                                                                              |
| 6                | H <sub>α</sub> : 1.53 m<br>H <sub>β</sub> : 1.61 m                                   | 1.62, m                                                                               | H <sub>α</sub> : 1.62, m<br>H <sub>β</sub> : 1.52, dd<br>(14.0, 3.6)                 | 1.58, m                                                                        |
| 7                | H <sub>α</sub> : 2.04, dt<br>(14.8, 3.6)<br>H <sub>β</sub> : 2.66, td<br>(17.6, 3.6) | H <sub>α</sub> : 2.576, td<br>(13.2, 4.8)<br>H <sub>β</sub> : 1.81, dt<br>(13.2, 3.6) | H <sub>α</sub> : 3.03, td<br>(14.0, 3.6)<br>H <sub>β</sub> : 1.72, dt<br>(14.0, 3.6) | H <sub>α</sub> : 2.36, m<br>H <sub>β</sub> : 1.75 dt<br>(14.0, 4.0)            |
| 8                | —                                                                                    | —                                                                                     | —                                                                                    | —                                                                              |
| 9                | —                                                                                    | —                                                                                     | —                                                                                    | —                                                                              |
| 10               | —                                                                                    | —                                                                                     | —                                                                                    | —                                                                              |
| 11               | H <sub>α</sub> : 2.21, dd<br>(14.4, 1.2)<br>H <sub>β</sub> : 2.95, d<br>(15.6)       | H <sub>α</sub> : 2.88, d (14.4)<br>H <sub>β</sub> : 2.27, dq<br>(14.4, 1.6)           | H <sub>α</sub> : 3.20, d<br>(16.4),<br>H <sub>β</sub> : 2.40, dq<br>(16.4, 1.2)      | H <sub>α</sub> : 2.95, d<br>(14.8)<br>H <sub>β</sub> : 1.97, dq<br>(14.8, 1.6) |
| 12               | 1.48, s                                                                              | 1.42, s                                                                               | 1.37, s                                                                              | 1.40, s                                                                        |
| 13               | 1.49, s                                                                              | 1.56, d (1.6)                                                                         | 1.67, d (1.2)                                                                        | 1.65, d (1.6)                                                                  |
| 14               | 1.22, s                                                                              | 1.24, s                                                                               | 1.25, s                                                                              | 1.36, s                                                                        |
| 15               | 1.36, s                                                                              | 1.37, s                                                                               | 1.38, s                                                                              | 1.23, s                                                                        |
| 1'               | H <sub>a</sub> : 4.99, d (1.0);<br>H <sub>b</sub> : 5.49, d (1.0)                    | H <sub>a</sub> : 5.25, d (1.0);<br>H <sub>b</sub> : 5.23, d (1.0)                     | H <sub>a</sub> : 5.33, d (1.4);<br>H <sub>b</sub> : 5.60, d (1.4)                    | H <sub>a</sub> : 5.00, br s;<br>H <sub>b</sub> : 5.24, br s                    |
| 2'               | —                                                                                    | —                                                                                     | —                                                                                    | —                                                                              |
| 3'               | —                                                                                    | —                                                                                     | —                                                                                    | —                                                                              |
| 4'               | —                                                                                    | —                                                                                     | —                                                                                    | 3.68, s                                                                        |
| 5'               | —                                                                                    | 4.28, q (6.4)                                                                         | 4.40, q (6.4)                                                                        | —                                                                              |
| 6'               | —                                                                                    | —                                                                                     | —                                                                                    | —                                                                              |
| 7'               | —                                                                                    | —                                                                                     | —                                                                                    | —                                                                              |
| 8'               | —                                                                                    | —                                                                                     | —                                                                                    | —                                                                              |
| 9'               | 1.50, s                                                                              | 1.30, s                                                                               | 1.66, s                                                                              | 1.33, s                                                                        |
| 10'              | 1.20, s                                                                              | 1.28, d (6.4)                                                                         | 1.28, d (6.4)                                                                        | 3.70, s                                                                        |
| OCH <sub>3</sub> | 3.76, s                                                                              | —                                                                                     | —                                                                                    | —                                                                              |
| OH               | 2.90, br s                                                                           | 2.72, br s                                                                            | 3.62, br s                                                                           | —                                                                              |

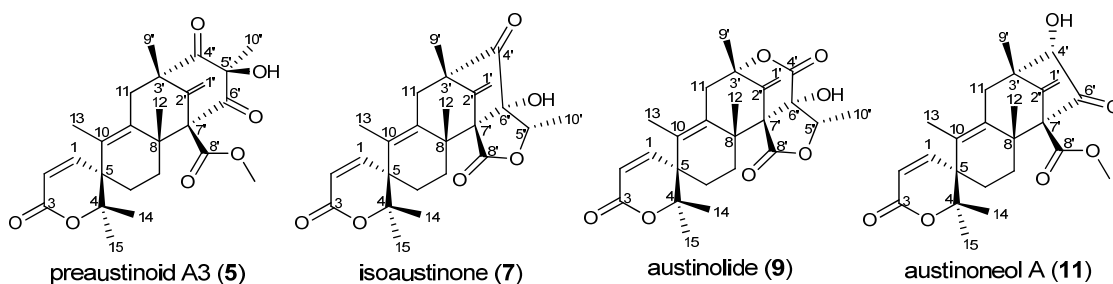

**Table S10.**  $^{13}\text{C}$  NMR data for compound **5**, **7**, **9**, **11** (100 MHz in  $\text{CDCl}_3$ )

| $\delta$ C     |                      |                      |                      |                      |
|----------------|----------------------|----------------------|----------------------|----------------------|
| Position       | <b>5</b>             | <b>7</b>             | <b>9</b>             | <b>11</b>            |
| 1              | 145.9, CH            | 147.0, CH            | 147.1, CH            | 146.6, CH            |
| 2              | 119.7, CH            | 119.2, CH            | 119.5, CH            | 119.2, CH            |
| 3              | 163.9, C             | 164.1, C             | 164.2, C             | 164.2, C             |
| 4              | 85.7, C              | 85.9, C              | 86.0, C              | 85.7, C              |
| 5              | 45.4, C              | 45.6, C              | 46.0, C              | 45.5, C              |
| 6              | 26.2, $\text{CH}_2$  | 27.0, $\text{CH}_2$  | 27.0, $\text{CH}_2$  | 26.4, $\text{CH}_2$  |
| 7              | 24.6, $\text{CH}_2$  | 26.0, $\text{CH}_2$  | 25.6, $\text{CH}_2$  | 24.4, $\text{CH}_2$  |
| 8              | 47.0, C              | 40.9, C              | 41.7, C              | 46.0, C              |
| 9              | 136.2, C             | 136.0, C             | 134.2, C             | 136.9, C             |
| 10             | 131.9, C             | 129.7, C             | 140.0, C             | 130.7, C             |
| 11             | 41.1, $\text{CH}_2$  | 42.5, $\text{CH}_2$  | 41.9, $\text{CH}_2$  | 36.1, $\text{CH}_2$  |
| 12             | 25.9, $\text{CH}_3$  | 22.2, $\text{CH}_3$  | 22.9, $\text{CH}_3$  | 20.9, $\text{CH}_3$  |
| 13             | 15.5, $\text{CH}_3$  | 15.1, $\text{CH}_3$  | 15.4, $\text{CH}_3$  | 15.3, $\text{CH}_3$  |
| 14             | 22.9, $\text{CH}_3$  | 23.1, $\text{CH}_3$  | 22.9, $\text{CH}_3$  | 25.8, $\text{CH}_3$  |
| 15             | 25.9, $\text{CH}_3$  | 25.7, $\text{CH}_3$  | 25.9, $\text{CH}_3$  | 23.1, $\text{CH}_3$  |
| 1'             | 113.9, $\text{CH}_2$ | 108.1, $\text{CH}_2$ | 115.0, $\text{CH}_2$ | 107.4, $\text{CH}_2$ |
| 2'             | 143.8, C             | 146.2, C             | 134.4, C             | 148.4, C             |
| 3'             | 51.1, C              | 55.2, C              | 83.8, C              | 46.5, C              |
| 4'             | 206.1, C             | 212.4, C             | 171.5, C             | 82.6, C              |
| 5'             | 78.1, C              | 76.3, CH             | 79.1, CH             | —                    |
| 6'             | 203.6, C             | 90.6, C              | 80.8, C              | 210.4, C             |
| 7'             | 71.8, C              | 66.1, C              | 63.1, C              | 69.1, C              |
| 8'             | 168.8, C             | 172.1, C             | 171.0, C             | 167.9, C             |
| 9'             | 22.8, $\text{CH}_3$  | 15.1, $\text{CH}_3$  | 23.7, $\text{CH}_3$  | 19.8, $\text{CH}_3$  |
| 10'            | 16.6, $\text{CH}_3$  | 12.6, $\text{CH}_3$  | 11.5, $\text{CH}_3$  | —                    |
| $\text{OCH}_3$ | 52.6, $\text{CH}_3$  | —                    | —                    | 52.2, $\text{CH}_3$  |

| ORFs      |                     | Homologs                                                                               |                         |
|-----------|---------------------|----------------------------------------------------------------------------------------|-------------------------|
| Gene      | Predicted size (aa) | Match from BLAST search at NCBI (accession no.)                                        | Identity/similarity (%) |
| AN8380.4  | 151                 | Terpene cyclase (AusN)[ <i>Aspergillus nidulans</i> ]<br>(in this study)               | 46/68                   |
| AN8382.4  | 241                 | Hypothetical protein                                                                   |                         |
| AN9250.4  | 516                 | TqaD (O-acetyltransferase) [ <i>Penicillium aethiopicum</i> ]<br>(ADY16688)            | 29/45                   |
| AN9251.4  | 535                 | GA14-synthase (P450 monooxygenase) [ <i>Gibberella intermedia</i> ]<br>(CAF31353)      | 36/58                   |
| AN9252.4  | 140                 | Hypothetical protein                                                                   |                         |
| AN9256.4  | 143                 | Hypothetical protein                                                                   |                         |
| AN11647.4 | 94                  | cyclopentadecanone 1,2-monooxygenase<br>[ <i>Pseudomonas sp.</i> HI-70](BAE93346)      | 42/61                   |
| AN11217.4 | 620                 | Bcmfs1(Major facilitator superfamily ) [ <i>Botryotinia fuckeliana</i> ]<br>(AAF64435) | 45/63                   |

**Table S11.** Annotation of genes internal to the cluster A and B not required for austinol/dehydroaustinol biosynthesis.

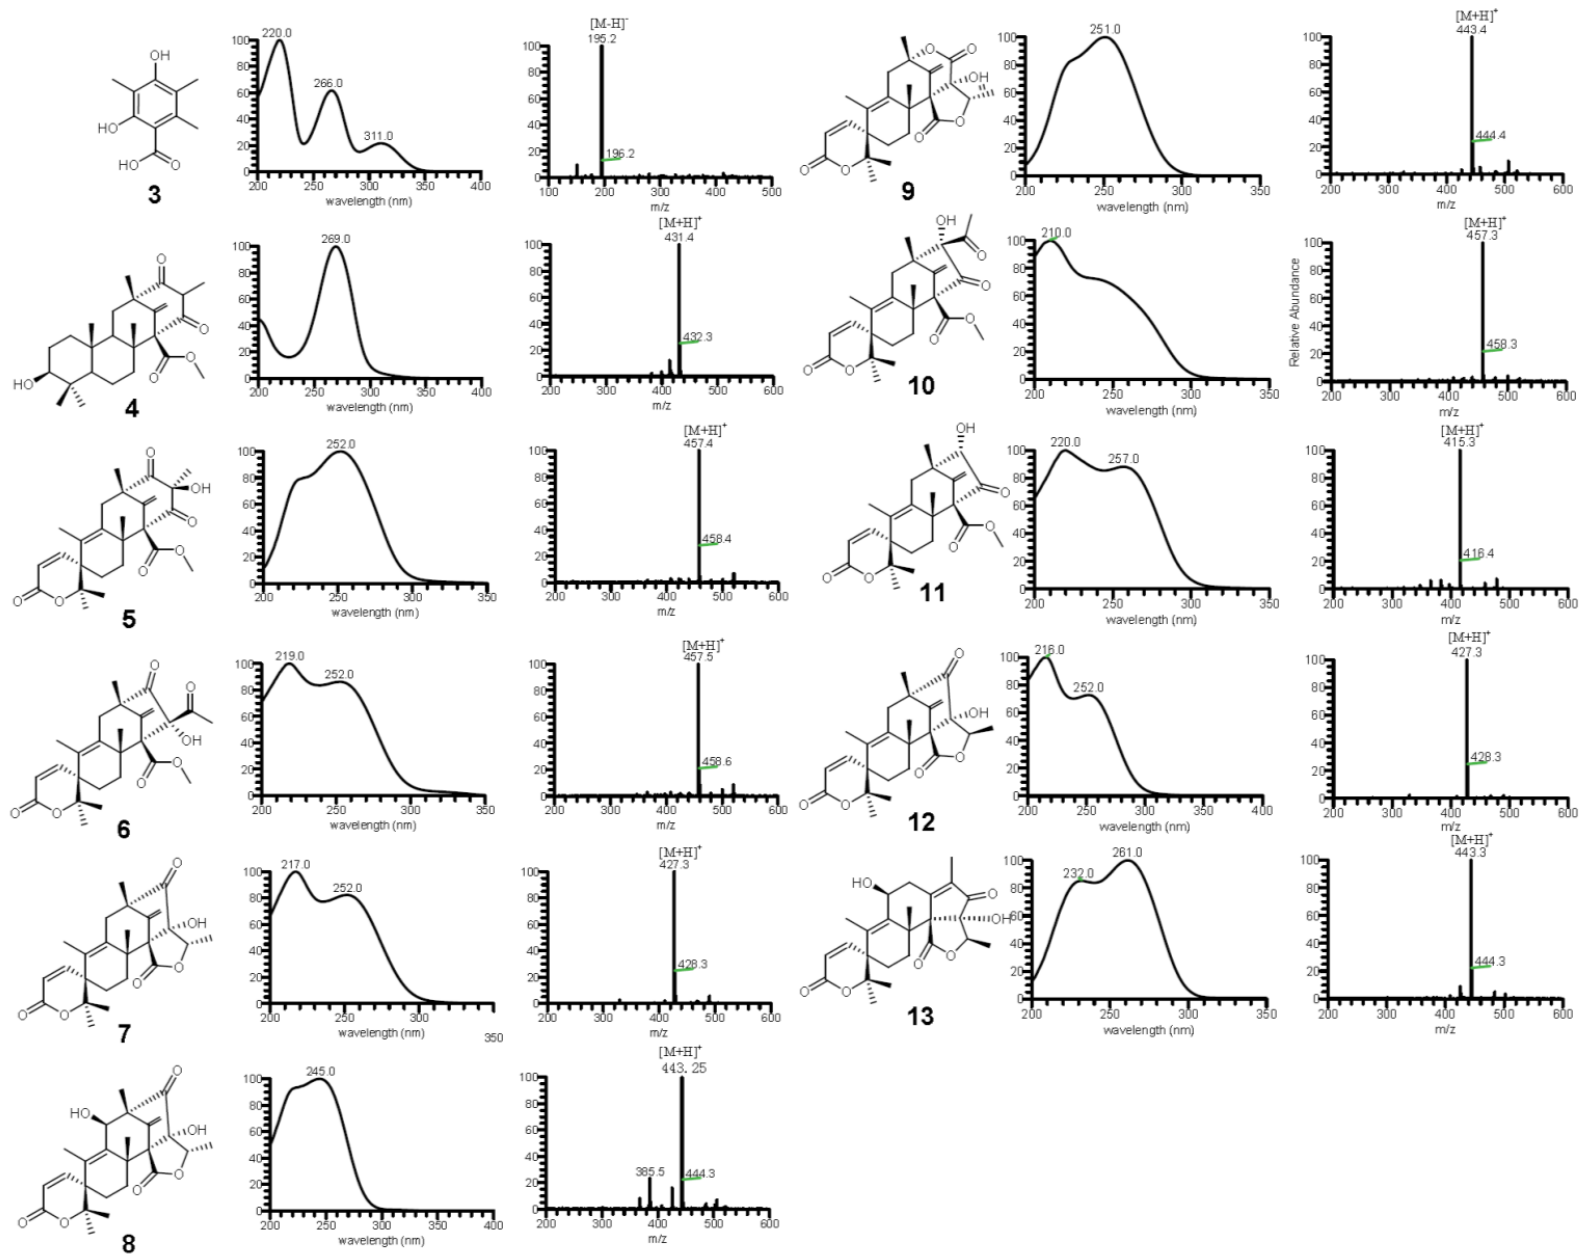

**Figure S1.** UV-Vis and ESIMS spectra of compounds isolated from *A. niduans*.

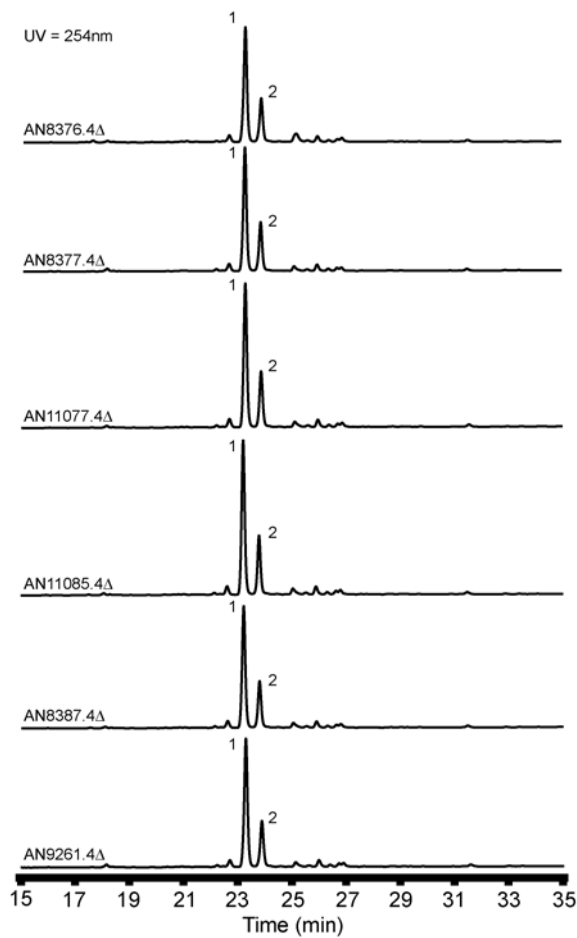

**Figure S2.** HPLC profiles of extracts from the remaining knockout strains not shown in figure 4 and 5 as detected by UV absorption at 254 nm.

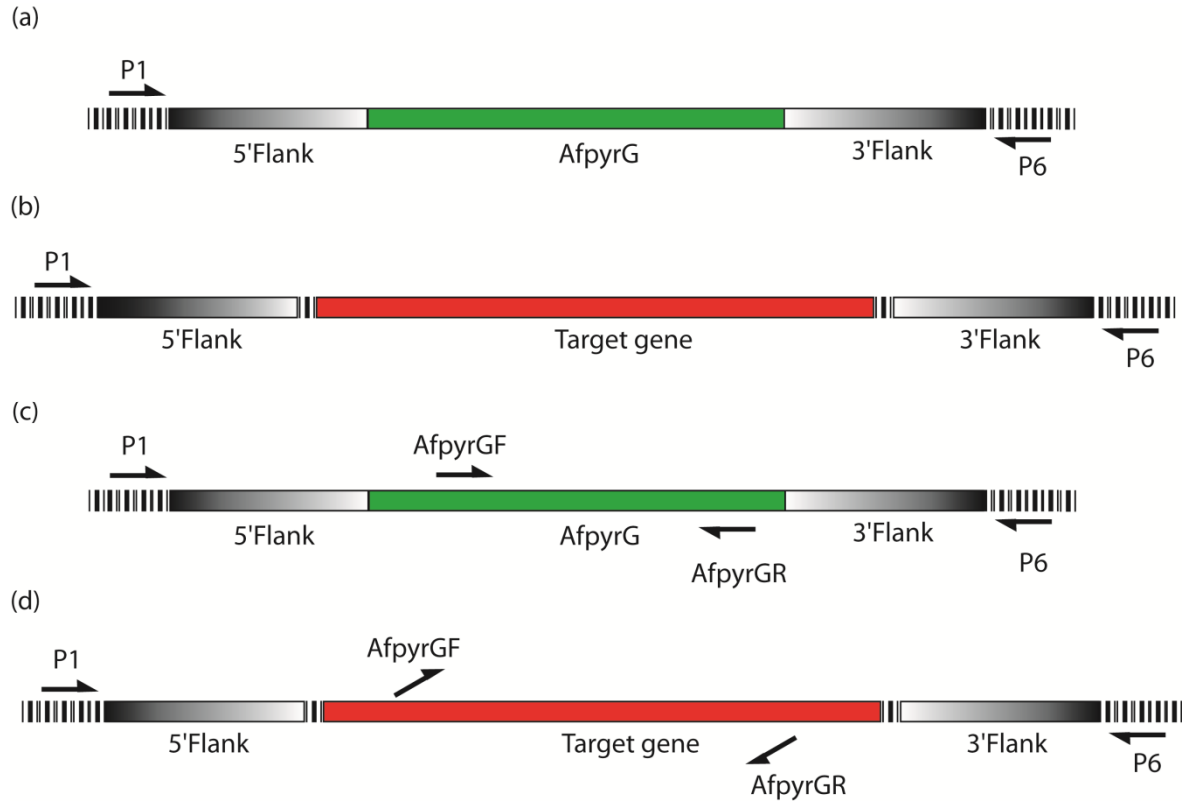

**Figure S3.** Schematic of the Diagnostic PCR strategy. We used two redundant strategies to determine if the target gene had been deleted by replacement with *AfpyrG*. In one strategy, DNA from transformants is amplified with two primers, P1 from the chromosomal region just outside of the 5' flank of the transforming DNA fragment and P6 from just outside of the 3' flank. If the target gene is different in size from the *AfpyrG* gene, which was used as a selectable marker for transformation, the PCR fragment amplified from a correct transformant (a) will be different in size from the fragment amplified if the target gene is intact (b). In some instances the target gene and the *AfpyrG* cassette will be of comparable size and a second strategy is applied. In the second strategy, P1 or P6 are used with internal primers specific to the *AfpyrG* cassette. For example, if the target gene has been replaced by the *AfpyrG* gene (c), P1 and AfpyrGR will amplify a fragment of a predictable size. If the target gene has not been replaced (d), the AfpyrGR primer will not anneal and there will be no specific amplification. Likewise AfpyrGF and P6 are used in combination and amplification will only occur if the target gene has been replaced by *AfpyrG*.

**AN8376.4**wt = 3,455 bp  
ko = 3,829 bp  
P1 + P6wt = no band  
ko = 2,420 bp  
P1 + PyrGRwt = no band  
ko = 2,665 bp  
P6 + PyrGF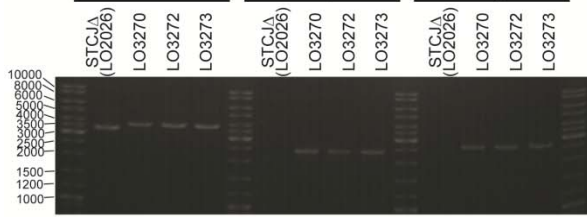**AN8377.4**wt = 3,325 bp  
ko = 3,897 bp  
P1 + P6wt = no band  
ko = 2,522 bp  
P1 + PyrGRwt = no band  
ko = 2,631 bp  
P6 + PyrGF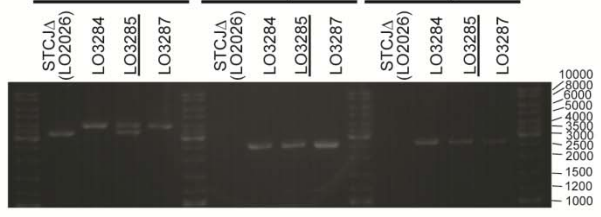**AN8378.4**wt = 3,784 bp  
ko = 3,970 bp  
P1 + P6wt = no band  
ko = 2,580 bp  
P1 + PyrGRwt = no band  
ko = 2,646 bp  
P6 + PyrGF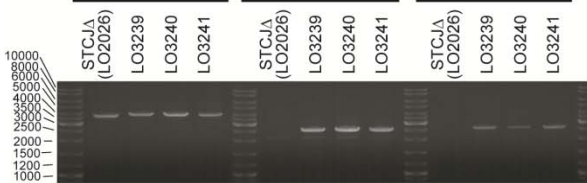**AN8379.4**wt = 4,809 bp  
ko = 3,866 bp  
P1 + P6wt = no band  
ko = 2,477 bp  
P1 + PyrGRwt = no band  
ko = 2,645 bp  
P6 + PyrGF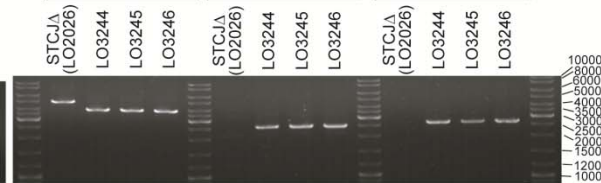**AN8380.4**wt = 2,999 bp  
ko = 3,922 bp  
P1 + P6wt = no band  
ko = 2,529 bp  
P1 + PyrGRwt = no band  
ko = 2,649 bp  
P6 + PyrGF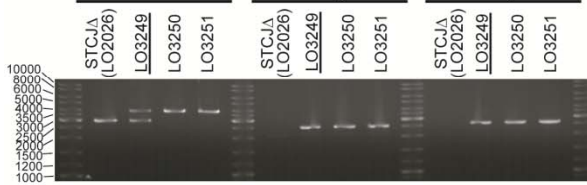**AN8381.4**wt = 4,663 bp  
ko = 3,926 bp  
P1 + P6wt = no band  
ko = 2,503 bp  
P1 + PyrGRwt = no band  
ko = 2,679 bp  
P6 + PyrGF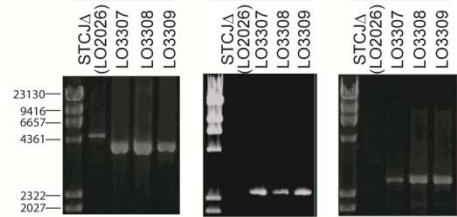**AN8382.4**wt = 3,113 bp  
ko = 3,893 bp  
P1 + P6wt = no band  
ko = 2,476 bp  
P1 + PyrGRwt = no band  
ko = 2,673 bp  
P6 + PyrGF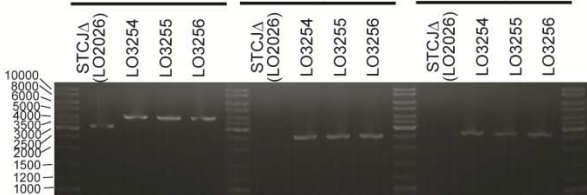**AN8383.4**wt = 10001 bp  
ko = 3787 bp  
P1 + P6wt = no band  
ko = 2443 bp  
P1 + PyrGRwt = no band  
ko = 2600 bp  
P6 + PyrGF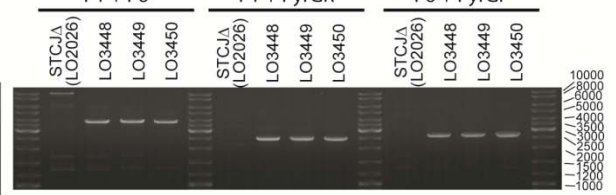

**AN8384.4**wt = 3,130 bp  
ko = 3,861 bp  
P1 + P6wt = no band  
ko = 2,443 bp  
P1 + PyrGRwt = no band  
ko = 2,674 bp  
P6 + PyrGF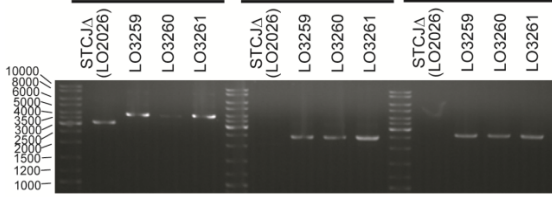**AN8385.4**wt = 3,091 bp  
ko = 4,013 bp  
P1 + P6wt = no band  
ko = 2,627 bp  
P1 + PyrGRwt = no band  
ko = 2,642 bp  
P6 + PyrGF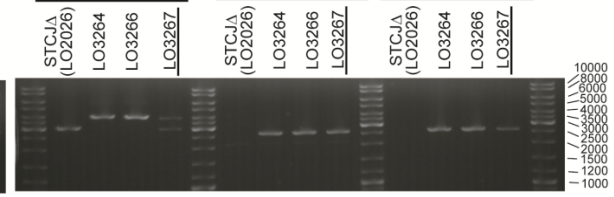**AN11077.4**wt = 2,937 bp  
ko = 3,849 bp  
P1 + P6wt = no band  
ko = 2,434 bp  
P1 + PyrGRwt = no band  
ko = 2,671 bp  
P6 + PyrGF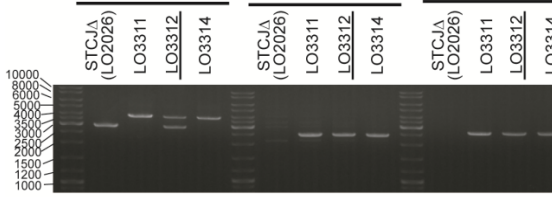**AN11085.4**wt = 3,450 bp  
ko = 4,029 bp  
P1 + P6wt = no band  
ko = 2,483 bp  
P1 + PyrGRwt = no band  
ko = 2,802 bp  
P6 + PyrGF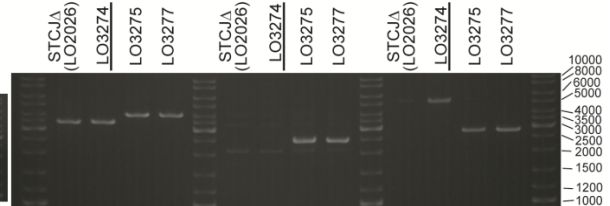**AN8387.4**wt = 3,119 bp  
ko = 4,095 bp  
P1 + P6wt = no band  
ko = 2,521 bp  
P1 + PyrGRwt = no band  
ko = 2,830 bp  
P6 + PyrGF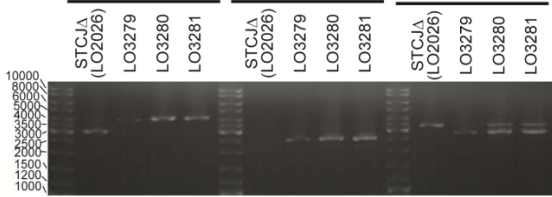**AN9244.4**wt = 8,783 bp  
ko = 3,593 bp  
P1 + P6wt = no band  
ko = 2,310 bp  
P1 + PyrGRwt = no band  
ko = 2,539 bp  
P6 + PyrGF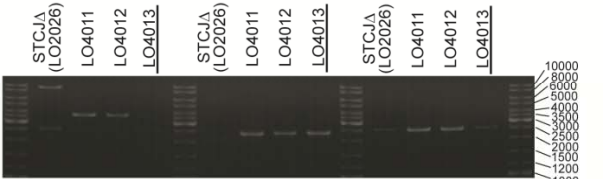**AN9245.4**wt = 4,304 bp  
ko = 4,027 bp  
P1 + P6wt = no band  
ko = 2,582 bp  
P1 + PyrGRwt = no band  
ko = 2,701 bp  
P6 + PyrGF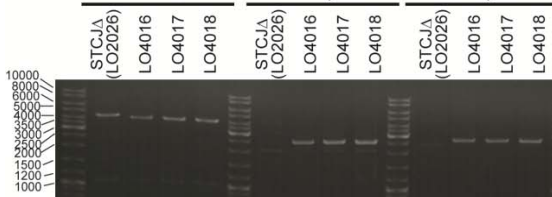**AN9246.4**wt = 3,117 bp  
ko = 3,890 bp  
P1 + P6wt = no band  
ko = 2,484 bp  
P1 + PyrGRwt = no band  
ko = 2,662 bp  
P6 + PyrGF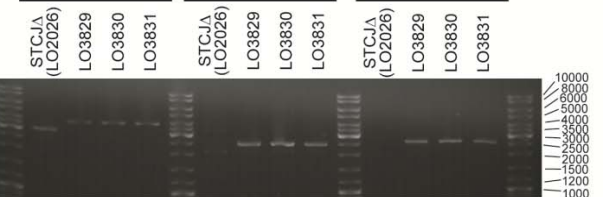



**AN9247.4**wt = 2,924 bp  
ko = 4,010 bp  
P1 + P6wt = no band  
ko = 2,474 bp  
P1 + PyrGRwt = no band  
ko = 2,792 bp  
P6 + PyrGF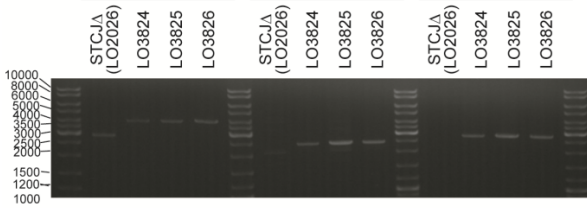**AN9248.4**wt = 4,213 bp  
ko = 3,904 bp  
P1 + P6wt = no band  
ko = 2,459 bp  
P1 + PyrGRwt = no band  
ko = 2,701 bp  
P6 + PyrGF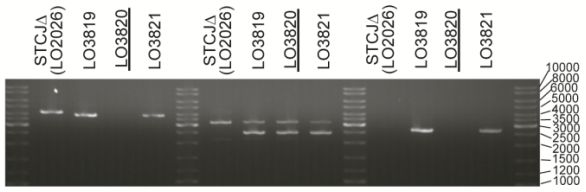**AN9249.4**wt = 3,061 bp  
ko = 4,041 bp  
P1 + P6wt = no band  
ko = 2,602 bp  
P1 + PyrGRwt = no band  
ko = 2,695 bp  
P6 + PyrGF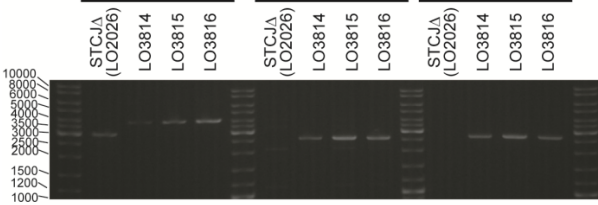**AN9250.4**wt = 3,930 bp  
ko = 4,032 bp  
P1 + P6wt = no band  
ko = 2,591 bp  
P1 + PyrGRwt = no band  
ko = 2,697 bp  
P6 + PyrGF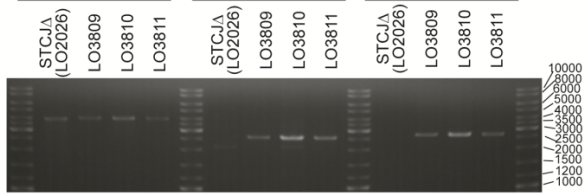**AN9251.4**wt = 3,858 bp  
ko = 3,803 bp  
P1 + P6wt = no band  
ko = 2,444 bp  
P1 + PyrGRwt = no band  
ko = 2,615 bp  
P6 + PyrGF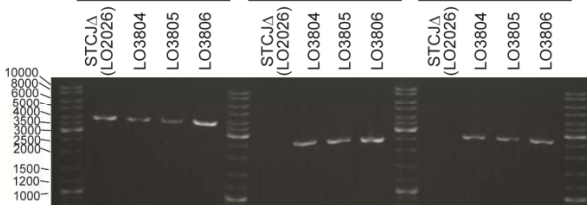**AN9252.4**wt = 2,922 bp  
ko = 3,874 bp  
P1 + P6wt = no band  
ko = 2,460 bp  
P1 + PyrGRwt = no band  
ko = 2,670 bp  
P6 + PyrGF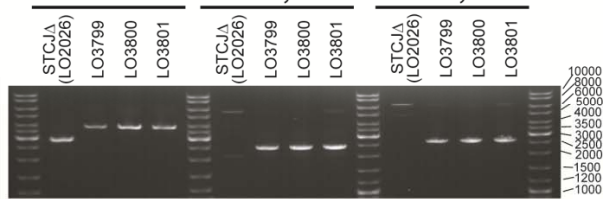**AN9253.4**wt = 4,035 bp  
ko = 4,000 bp  
P1 + P6wt = no band  
ko = 2,625 bp  
P1 + PyrGRwt = no band  
ko = 2,631 bp  
P6 + PyrGF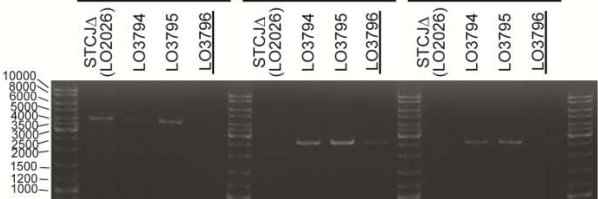**AN9254.4**wt = 2,787 bp  
ko = 3,868 bp  
P1 + P6wt = no band  
ko = 2,484 bp  
P1 + PyrGRwt = no band  
ko = 2,640 bp  
P6 + PyrGF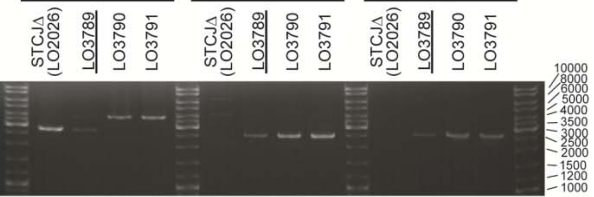

**AN11214.4**

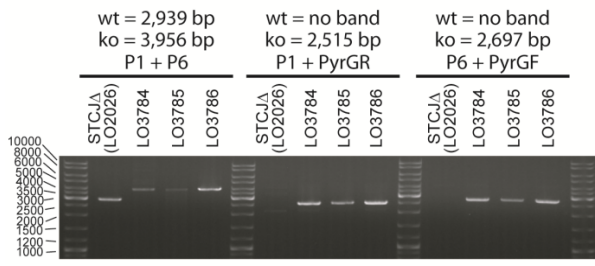

**AN11205.4**

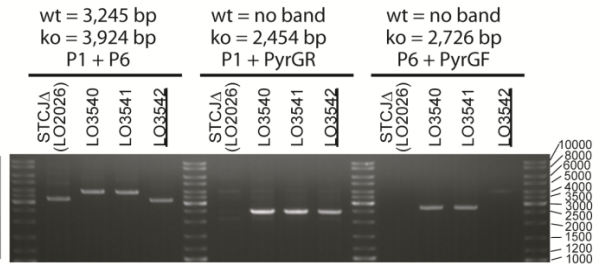

**AN9256.4**

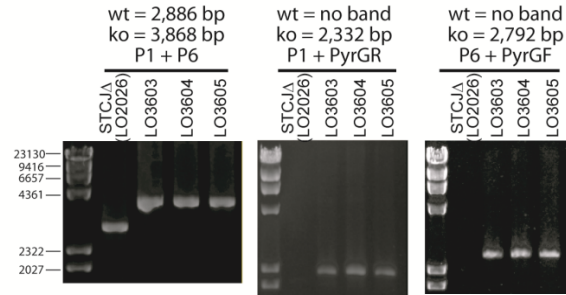

**AN11647.4**

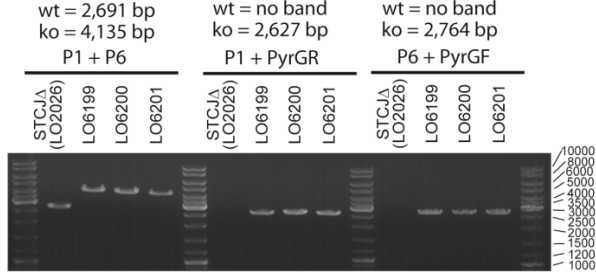

**AN9257.4**

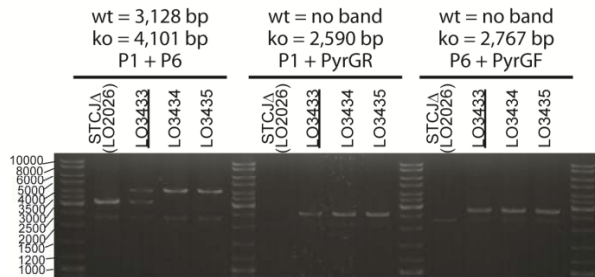

**AN11217.4**

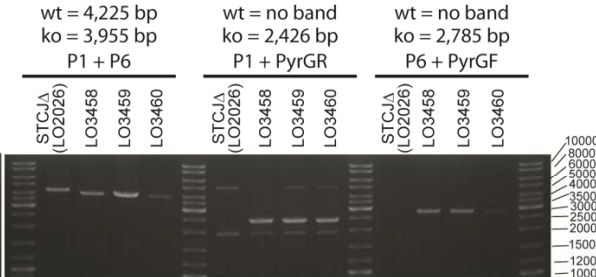

**AN11206.4**

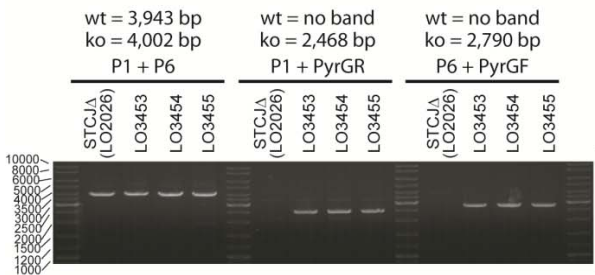

**AN9259.4**

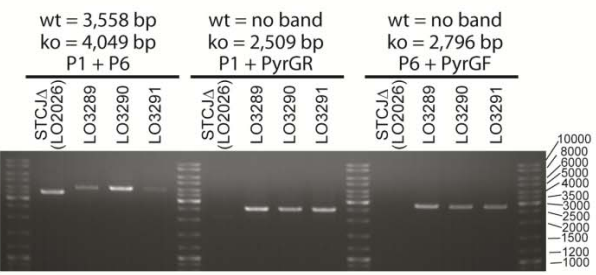

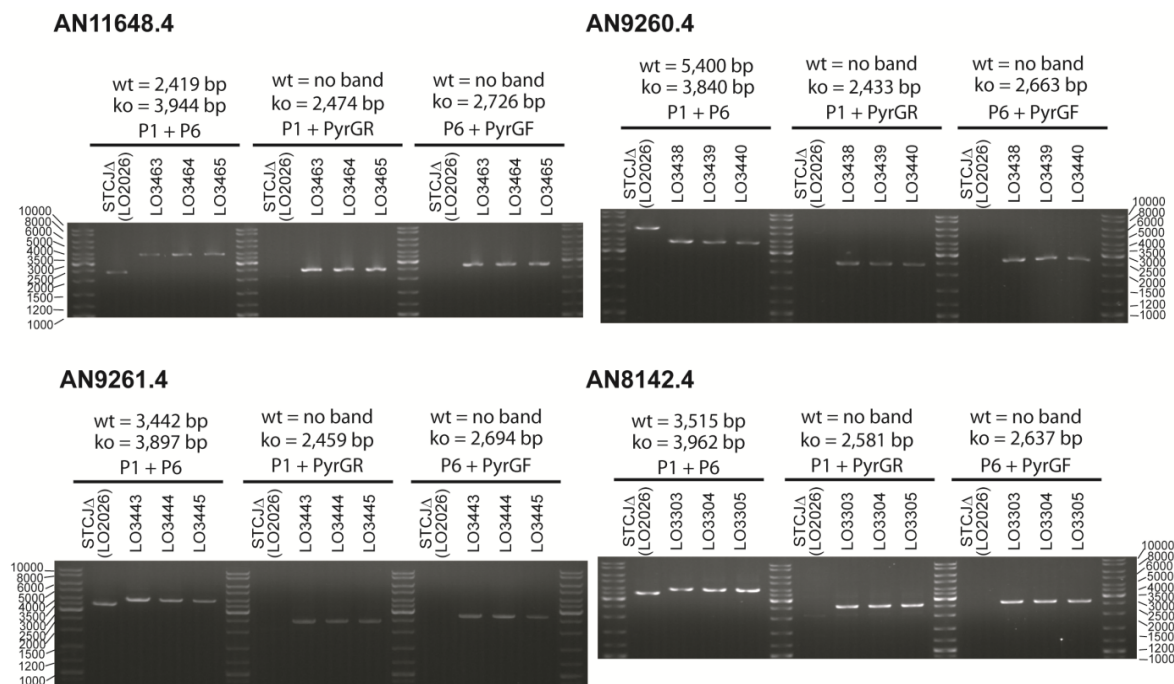

**Figure S4.** Results of diagnostic PCR for all the gene deletion strains. Strain numbers underlined are incorrect transformants that were not used for metabolite analysis.

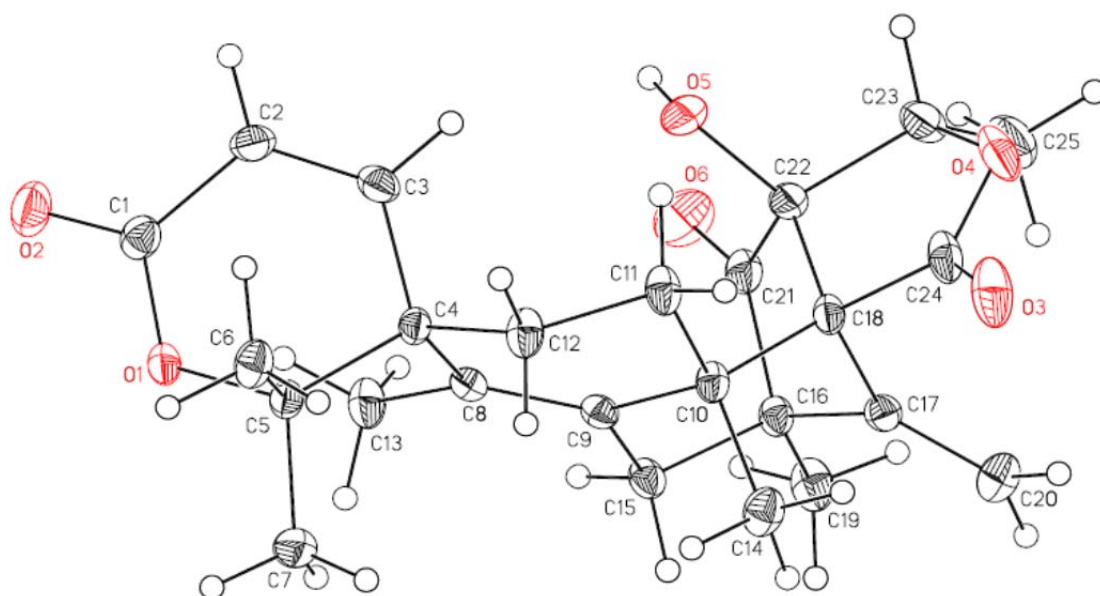

**Figure S5.** ORTEP drawing of (5'*R*)-isoaustinone **12**.

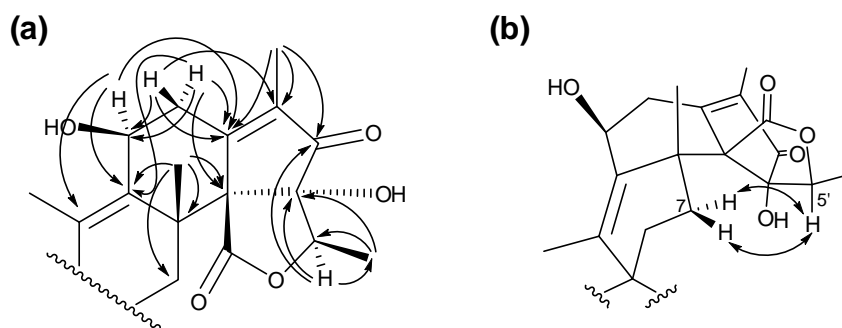

**Figure S6.** (a) Key gHMBC and (b) NOESY correlations in C, D, and E rings of neoaustinone **13**.

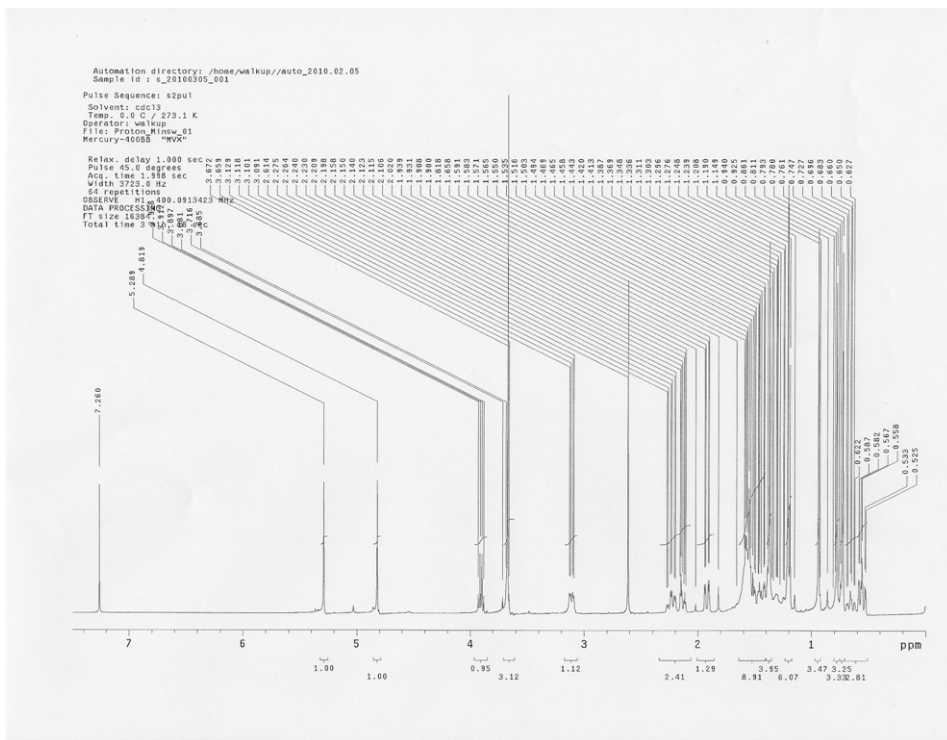

Figure S7. <sup>1</sup>H NMR spectrum of compound 4

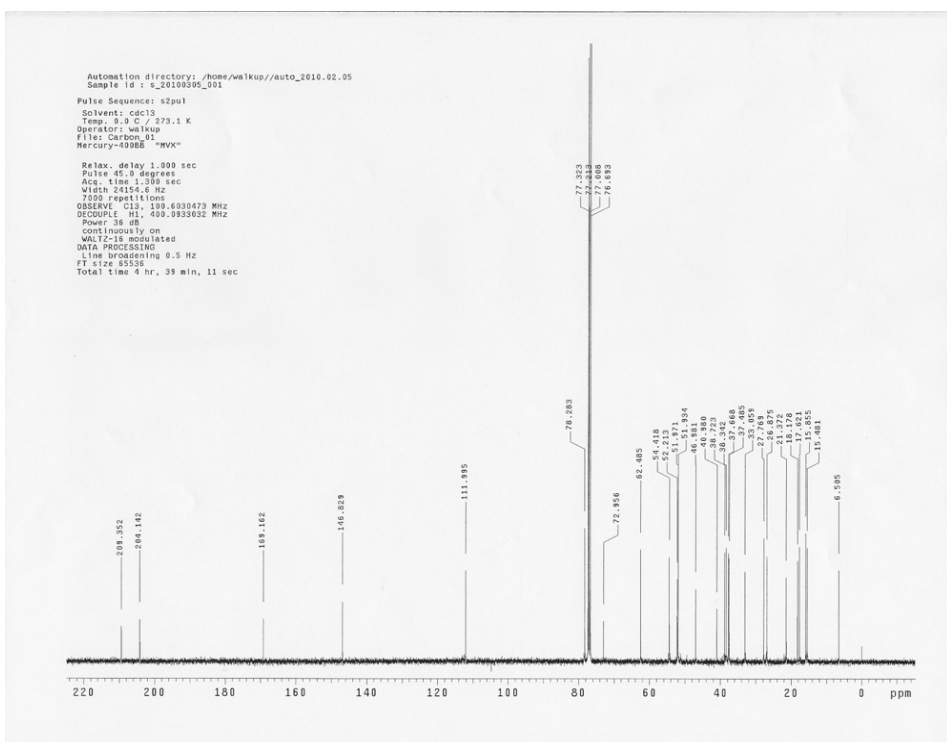

Figure S8. <sup>13</sup>C NMR spectrum of compound 4

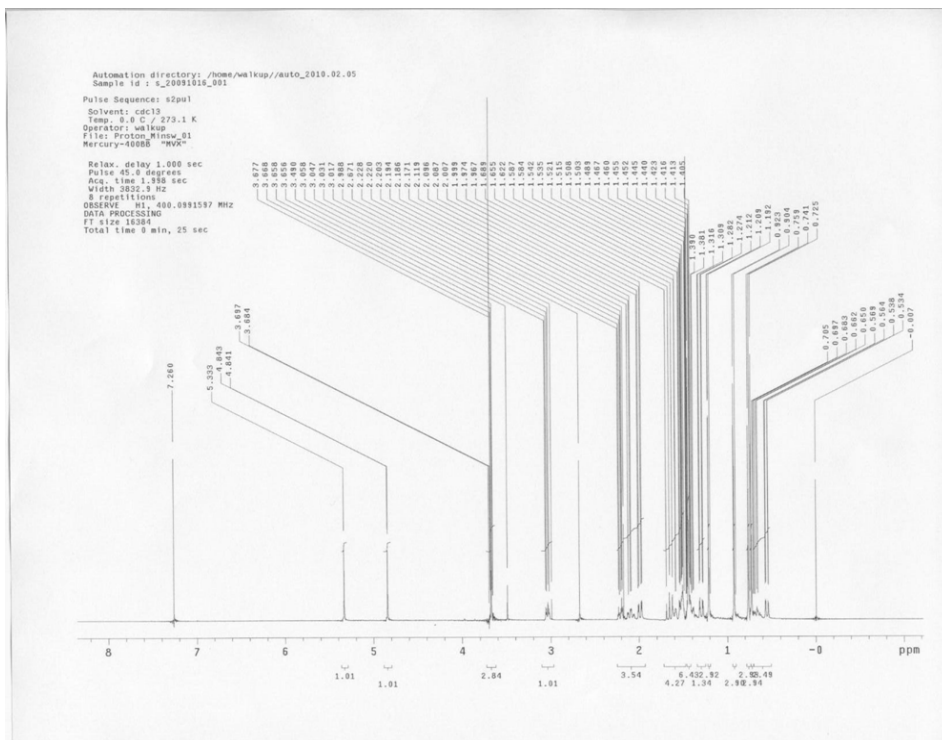

Figure S9.  $^1\text{H}$  NMR spectrum of compound **4** after autooxidation

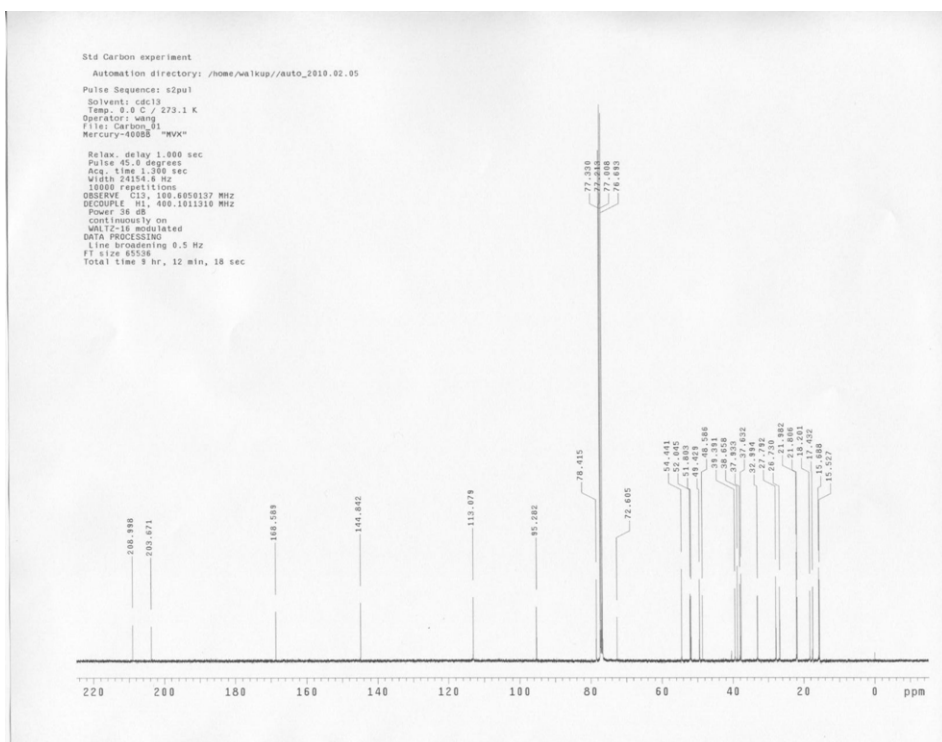

Figure S10.  $^{13}\text{C}$  NMR spectrum of compound **4** after autooxidation









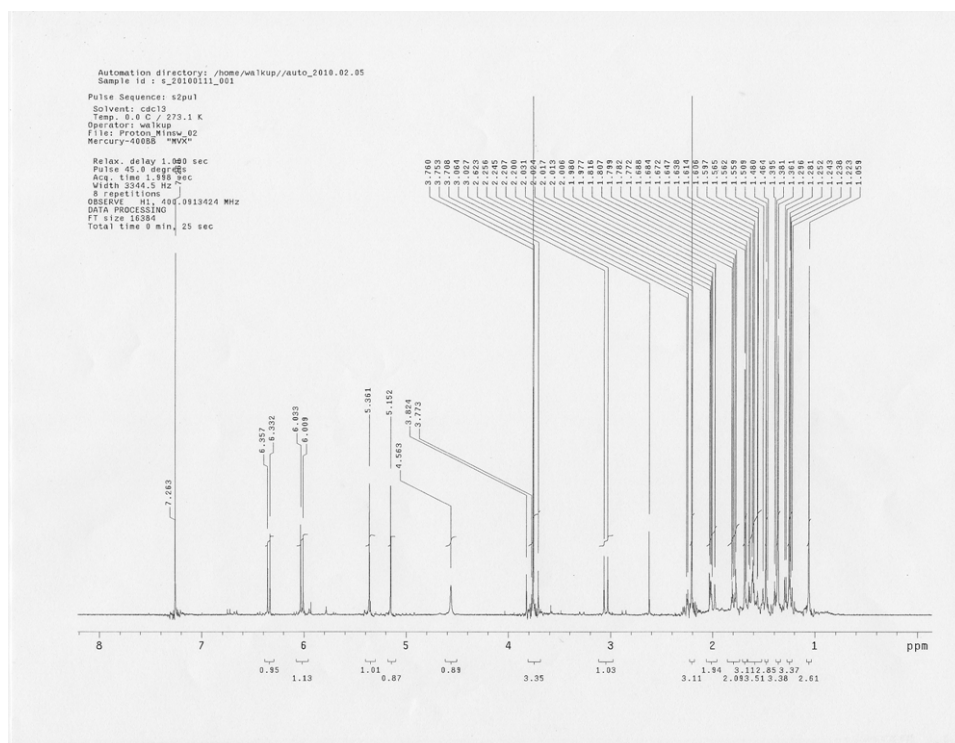

Figure S15.  $^1\text{H}$  NMR spectrum of compound 10

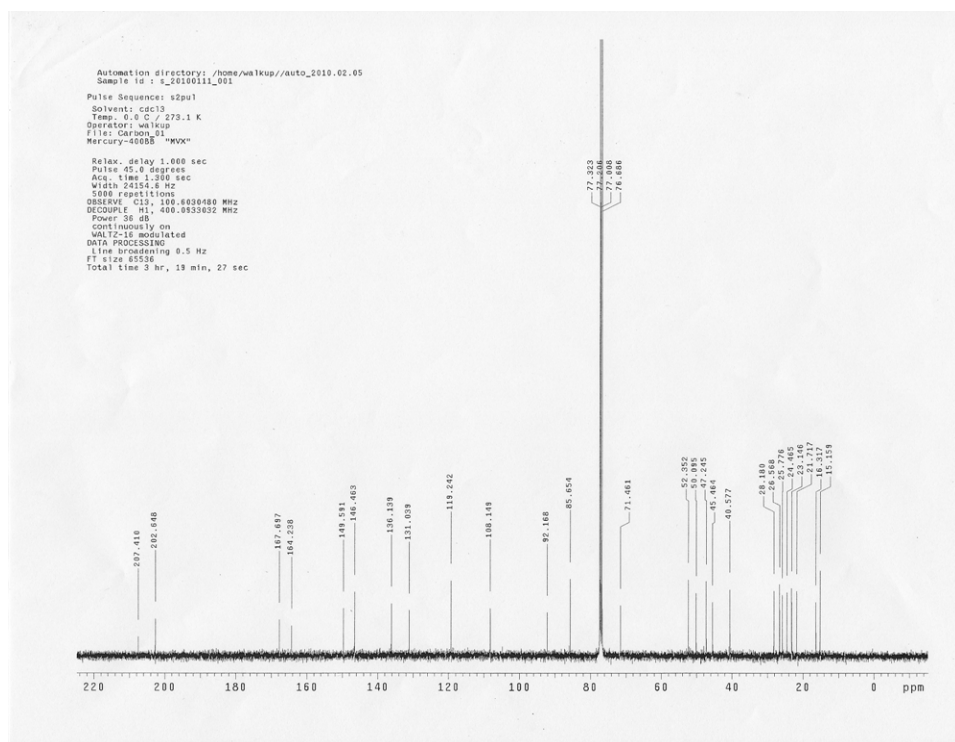

Figure S16.  $^{13}\text{C}$  NMR spectrum of compound 10

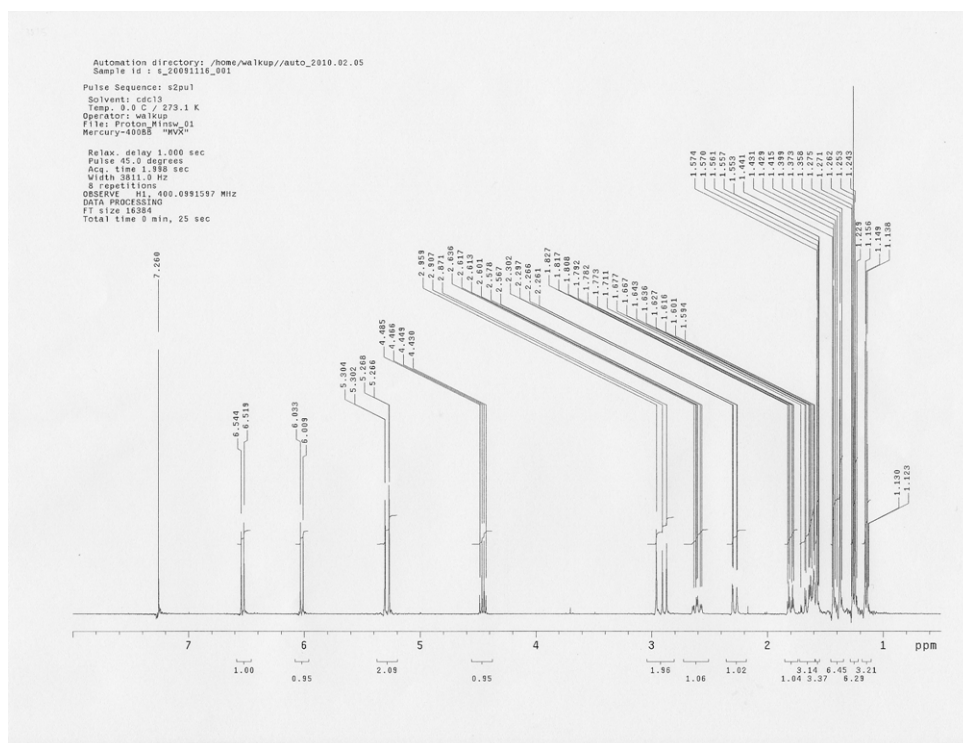

Figure S17.  $^1\text{H}$  NMR spectrum of compound 12

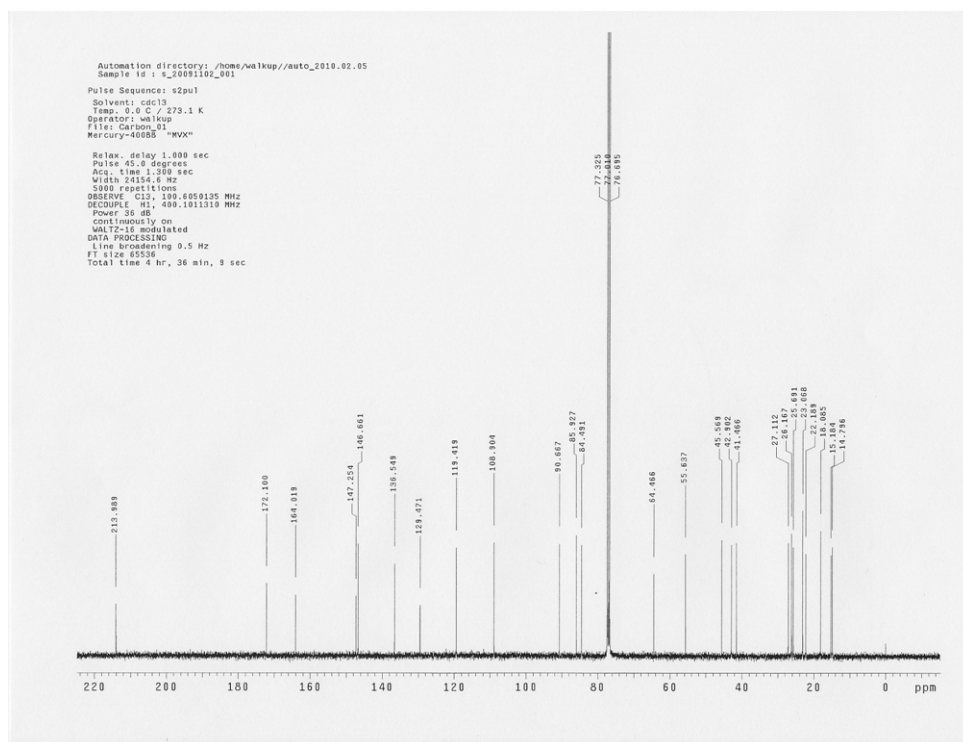

Figure S18.  $^{13}\text{C}$  NMR spectrum of compound 12

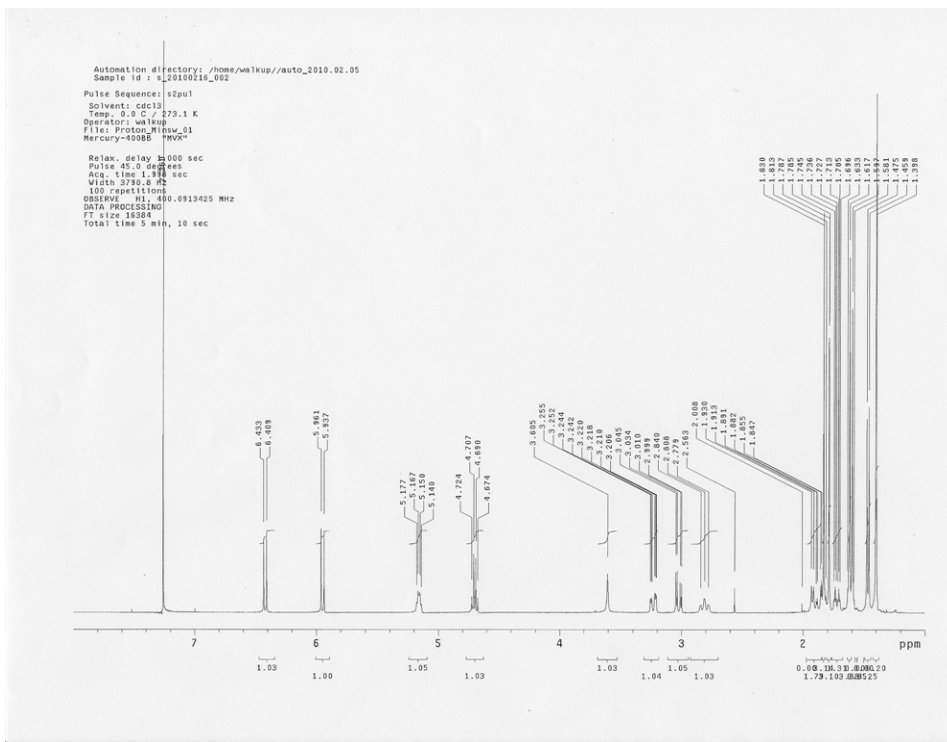

Figure S19.  $^1\text{H}$  NMR spectrum of compound 13

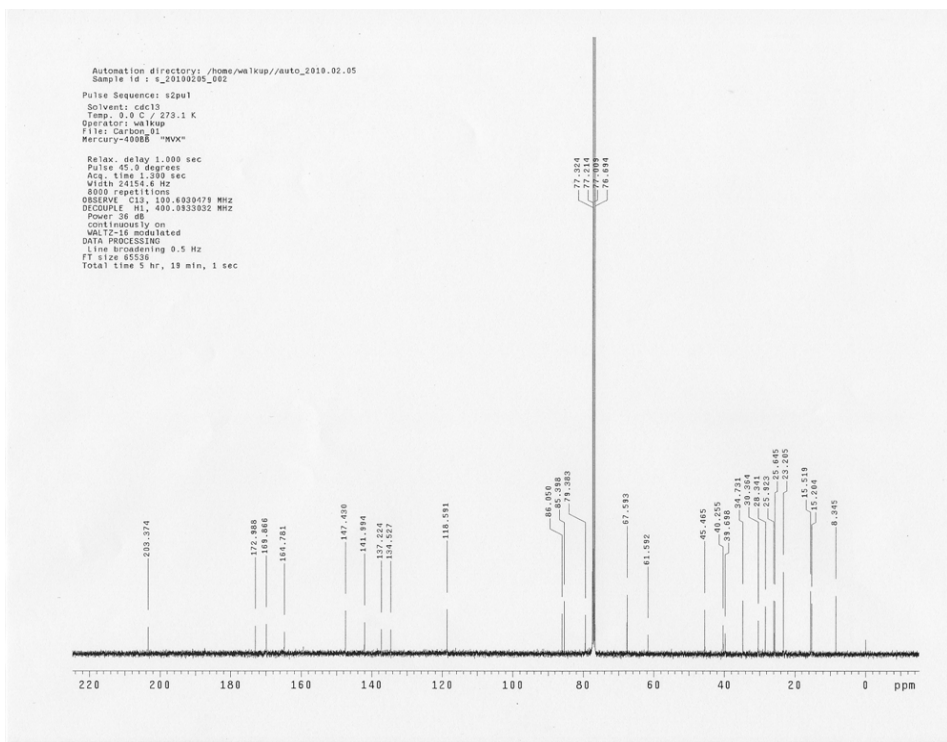

Figure S20.  $^{13}\text{C}$  NMR spectrum of compound 13

*A. nidulans* Austinol biosynthesis gene clusters

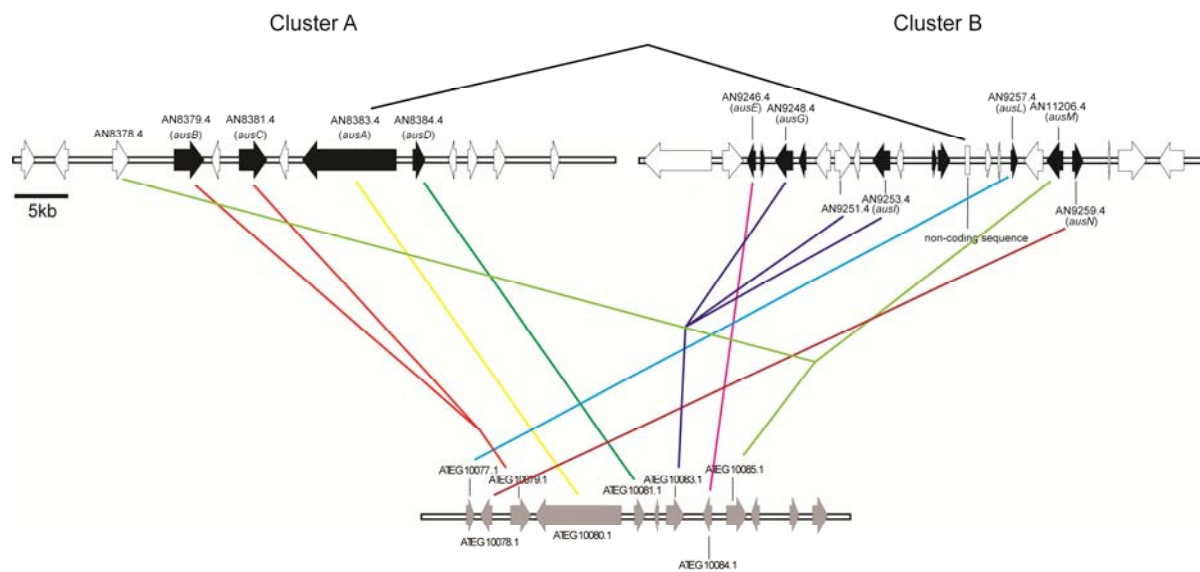

Putative *A. terreus* meroterpenoid biosynthesis gene cluster

**Figure S21.** Relationship between homologous genes in the austinol clusters of *A. nidulans* and a putative meroterpenoid cluster of *A. terreus*. Lines connect homologous genes. The homology was determined by BLAST analysis and only homology with E values lower than  $1E-26$  are shown here.
